# Supplementary material for: The increasing prevalence of HIV/Helicobacter pylori co-infection over time, along with the evolution of antiretroviral therapy (ART)
Source: PeerJ. 2017 May 30;5:e3392. doi: 10.7717/peerj.3392 (PMC5452935; doi:10.7717/peerj.3392)
Supplement: Supplemental Information 3 — Each worksheet contains the raw data used to generate one of the tables or figures in the manuscript. [file peerj-05-3392-s003.xlsx]

## Sheet: Description
The workbook contains seven worksheets (five tables and two figures)
Each worksheet contains the raw data used to generate one of the tables/figures in the manuscript
Variable names in the first row are brief descriptions that can be easily mapped to the variables in the tables

## Sheet: Table 1
ART_year_group	Ages	gender	Educational_level	CD4_count_EGD	CD4_cutoff_200	length_of_HIV_years	PCR_HIV_viremia_EGD	HIV_risk_behavior_recode	AIDS_stadijum_nominal
1993-1997	34	male
1993-1997	34	male
1993-1997	49	femal
1993-1997	54	male
1993-1997	34	male				4
1993-1997	67	femal
1993-1997	40	femal
1993-1997	33	male
1999-2003	37	male		50	≤ 200	0
1999-2003	25	male				3
1999-2003	42	male
1999-2003	46	femal
1993-1997	61	male	secundary	35	≤ 200	2		sex	Yes_ AIDS
1993-1997	59	male	secundary	110	≤ 200	0		sex	Yes_ AIDS
1993-1997	33	femal	Higher	107	≤ 200	2		sex	Yes_ AIDS
1993-1997	68	male	Higher	210	> 200	0		sex	Yes_ AIDS
1993-1997	37	male	Primary	8	≤ 200	1		sex	Yes_ AIDS
1993-1997	30	male	Primary	30	≤ 200	1		sex	Yes_ AIDS
1993-1997	42	male	Primary	327	> 200	2		sex	No_AIDS
1993-1997	49	male	Higher	35	≤ 200	1		sex	Yes_ AIDS
1993-1997	37	male	Primary	38	≤ 200	2		sex	Yes_ AIDS
1993-1997	25	femal	Higher	100	≤ 200	2	12246	sex	Yes_ AIDS
1993-1997	38	male	secundary	100	≤ 200	1		sex	Yes_ AIDS
1999-2003	45	male	Primary	194	≤ 200	0	1223393	sex	Yes_ AIDS
1999-2003	38	femal	Higher	80	≤ 200	1		sex	Yes_ AIDS
1999-2003	44	male	Primary	26	≤ 200	1		sex	Yes_ AIDS
1999-2003	24	male	Primary	500	> 200	1		sex	No_AIDS
1999-2003	41	male	Primary	37	≤ 200	2		sex	Yes_ AIDS
1999-2003	63	male	secundary	50	≤ 200	3		sex	Yes_ AIDS
1999-2003	48	male	secundary	150	≤ 200	0		sex	Yes_ AIDS
1999-2003	36	male	secundary	207	> 200	3	0	sex	Yes_ AIDS
1999-2003	36	femal	secundary	180	≤ 200	3	0	sex	Yes_ AIDS
1999-2003	58	male	secundary	150	≤ 200	5		sex	Yes_ AIDS
1999-2003	37	femal	Higher	267	> 200	0		sex	No_AIDS
1999-2003	51	male	secundary	99	≤ 200	1	16767	sex	Yes_ AIDS
1999-2003	47	femal	Primary	194	≤ 200	4	2454	sex	Yes_ AIDS
1999-2003	50	male	Primary	163	≤ 200	2	0	sex	Yes_ AIDS
1999-2003	30	femal	Higher	275	> 200	1		sex	Yes_ AIDS
1999-2003	40	male	Primary	180	≤ 200	4		sex	Yes_ AIDS
1999-2003	53	femal	secundary	368	> 200	1	0	sex	No_AIDS
1999-2003	31	male	secundary	549	> 200	10	0	sex	No_AIDS
2011-2015	37	femal	Primary	50	≤ 200	0	0	sex	Yes_ AIDS
2011-2015	33	male	Higher	260	> 200	2	0	sex	Yes_ AIDS
2011-2015	36	male	Higher	2	≤ 200	0	20	sex	Yes_ AIDS
2011-2015	49	male	secundary	450	> 200	15	250	sex	Yes_ AIDS
2011-2015	24	male	Higher	354	> 200	0	87	sex	Yes_ AIDS
2011-2015	39	femal	Primary	250	> 200	1	0	sex	Yes_ AIDS
2011-2015	27	male	Higher	3	≤ 200	0	10000000	sex	Yes_ AIDS
2011-2015	58	male	secundary	408	> 200	1		sex	No_AIDS
2011-2015	30	femal	Higher	374	> 200	1		sex	No_AIDS
2011-2015	39	male	Higher	556	> 200	6	0	sex	Yes_ AIDS
2011-2015	31	male	secundary	173	≤ 200	1	20	sex	Yes_ AIDS
2011-2015	57	male	Higher	483	> 200			sex	Yes_ AIDS
2011-2015	33	male	Higher	75	≤ 200	1	5750	sex	Yes_ AIDS
2011-2015	68	male	Primary	130	≤ 200	8		sex	Yes_ AIDS
2011-2015	32	male	secundary	620	> 200	2	145	sex	Yes_ AIDS
2011-2015	32	male	secundary	376	> 200	3	0	sex	No_AIDS
2011-2015	30	male	secundary	829	> 200	7	79	sex	Yes_ AIDS
2011-2015	29	male	secundary	447	> 200	1	63	sex	No_AIDS
2011-2015	28	male	secundary	174	≤ 200	3	20	sex	Yes_ AIDS
2011-2015	50	femal	secundary	41	≤ 200	16	99000	sex	Yes_ AIDS
2011-2015	38	male	Higher	58	≤ 200	1	121000	sex	Yes_ AIDS
2011-2015	51	male	Higher	90	≤ 200	11	70	sex	Yes_ AIDS
2011-2015	49	femal	secundary	353	> 200	2	24	sex	No_AIDS
2011-2015	42	male	secundary	456	> 200	16	0	sex	Yes_ AIDS
2011-2015	37	male	secundary	600	> 200	6	0	sex	No_AIDS
2011-2015	28	male	secundary	891	> 200	3	68	sex	Yes_ AIDS
2011-2015	58	male	secundary	738	> 200	15	0	sex	Yes_ AIDS
2011-2015	38	male	secundary	722	> 200	12	206	sex	Yes_ AIDS
2011-2015	58	male	secundary	436	> 200	3	0	sex	Yes_ AIDS
2011-2015	32	male	secundary	138	≤ 200	0	62	sex	Yes_ AIDS
2011-2015	37	male	Higher	390	> 200	5	184	sex	Yes_ AIDS
2011-2015	50	femal	Higher	528	> 200	17	20	sex	Yes_ AIDS
2011-2015	27	male	Primary	380	> 200	4	0	sex	No_AIDS
2011-2015	34	male	Higher	309	> 200	1	20	sex	No_AIDS
2011-2015	51	male	secundary	1019	> 200	10	0	sex	No_AIDS
2011-2015	30	male	secundary	306	> 200	6	72	sex	Yes_ AIDS
2011-2015	34	femal	Higher	257	> 200	7	0	sex	Yes_ AIDS
2011-2015	36	male	Higher	477	> 200	7	40	sex	No_AIDS
2011-2015	41	male	secundary	447	> 200	6	0	sex	No_AIDS
2011-2015	83	male	Higher	291	> 200	4	20	sex	Yes_ AIDS
2011-2015	29	male	secundary	10	≤ 200	9	501000	sex	Yes_ AIDS
2011-2015	25	male	Higher	517	> 200	0	0	sex	No_AIDS
2011-2015	32	male	Higher	292	> 200	2	0	sex	Yes_ AIDS
1993-1997	41	male	Higher	35	≤ 200	9		IVDU	Yes_ AIDS
1993-1997	29	femal	secundary	39	≤ 200	2		IVDU	Yes_ AIDS
1993-1997	37	male				0		IVDU	Yes_ AIDS
1993-1997	32	male				0		IVDU	Yes_ AIDS
1993-1997	31	femal	Primary	230	> 200	3		IVDU	No_AIDS
1993-1997	35	male	secundary	43	≤ 200	4		IVDU	Yes_ AIDS
1993-1997	25	femal		46	≤ 200	0		IVDU	Yes_ AIDS
1993-1997	37	femal	Higher	70	≤ 200	2		IVDU	Yes_ AIDS
1993-1997	39	male	secundary	90	≤ 200	1		IVDU	Yes_ AIDS
1993-1997	40	male	secundary	4	≤ 200	7		blood_blood.product	Yes_ AIDS
1993-1997	37	male	Primary	48	≤ 200	0		IVDU	Yes_ AIDS
1993-1997	26	male	secundary	60	≤ 200	2		IVDU	Yes_ AIDS
1993-1997	31	male	secundary	110	≤ 200	1		IVDU	Yes_ AIDS
1993-1997	24	femal	secundary	20	≤ 200	3		IVDU	Yes_ AIDS
1993-1997	30	male	secundary	270	> 200	1		IVDU	No_AIDS
1993-1997	33	femal	secundary	40	≤ 200	0		IVDU	Yes_ AIDS
1993-1997	55	male	secundary	308	> 200	0		unknown	Yes_ AIDS
1993-1997	63	femal	Higher	234	> 200	0		blood_blood.product	Yes_ AIDS
1993-1997	32	male	secundary	80	≤ 200	0		IVDU	Yes_ AIDS
1993-1997	21	male	Primary	86	≤ 200	0		unknown	Yes_ AIDS
1993-1997	36	male	secundary	8	≤ 200	0		IVDU	Yes_ AIDS
1993-1997	43	male	Primary	38	≤ 200	5		IVDU	Yes_ AIDS
1993-1997	42	male	secundary	110	≤ 200	7		IVDU	Yes_ AIDS
1993-1997	31	male	Primary	40	≤ 200	3		IVDU	Yes_ AIDS
1993-1997	34	femal	Higher	54	≤ 200	1		IVDU	Yes_ AIDS
1993-1997	30	male	secundary	200	≤ 200	2		IVDU	Yes_ AIDS
1993-1997	41	male	secundary	94	≤ 200	1		unknown	Yes_ AIDS
1993-1997	40	femal	Higher	400	> 200	5		unknown	No_AIDS
1993-1997	38	male	Primary	43	≤ 200	0		unknown	Yes_ AIDS
1993-1997	49	femal	secundary	270	> 200	0		unknown	Yes_ AIDS
1993-1997	39	male	Primary	105	≤ 200	11		IVDU	Yes_ AIDS
1993-1997	32	male	secundary	38	≤ 200	0		IVDU	Yes_ AIDS
1993-1997	55	male	Primary	30	≤ 200	2		blood_blood.product	Yes_ AIDS
1993-1997	32	male	Higher	225	> 200	6		IVDU	No_AIDS
1993-1997	27	male	secundary	27	≤ 200	2		blood_blood.product	Yes_ AIDS
1999-2003	43	femal	Higher	150	≤ 200	3		blood_blood.product	Yes_ AIDS
1999-2003	27	male	secundary	380	> 200	0		IVDU	No_AIDS
1999-2003	36	femal	secundary	6	≤ 200	4		IVDU	Yes_ AIDS
1999-2003	30	femal	secundary	50	≤ 200	2		IVDU	Yes_ AIDS
1999-2003	32	male	Higher	357	> 200	9	5791	IVDU	Yes_ AIDS
1999-2003	39	femal	secundary	400	> 200	13	6667	IVDU	Yes_ AIDS
1999-2003	37	male	Primary	200	≤ 200	13	350	IVDU	Yes_ AIDS
1999-2003	34	femal	Primary	250	> 200	2		blood_blood.product	Yes_ AIDS
1999-2003	59	male	Primary	35	≤ 200	0		blood_blood.product	Yes_ AIDS
1999-2003	28	femal	secundary	310	> 200	11		IVDU	Yes_ AIDS
1999-2003	23	femal	Higher	240	> 200	3	0	blood_blood.product	Yes_ AIDS
1999-2003	18	femal	Higher	99	≤ 200	8	12888	blood_blood.product	Yes_ AIDS
1999-2003	35	male	secundary	138	≤ 200	0		unknown	Yes_ AIDS
1999-2003	41	femal	secundary	198	≤ 200	6	219	IVDU	Yes_ AIDS
2011-2015	51	male	secundary	186	≤ 200	2	20	IVDU	Yes_ AIDS
2011-2015	50	male	secundary	87	≤ 200	12		IVDU	Yes_ AIDS
2011-2015	44	male	Higher	311	> 200	1	1579	unknown	No_AIDS
2011-2015	58	male	Higher	80	≤ 200	0	145000	unknown	Yes_ AIDS
2011-2015	48	male	Higher	220	> 200	2	0	blood_blood.product	Yes_ AIDS
2011-2015	57	male	secundary	208	> 200	29	0	IVDU	Yes_ AIDS
2011-2015	39	male	Higher	505	> 200	7	0	unknown	No_AIDS
2011-2015	33	male	secundary	510	> 200	3	20	unknown	Yes_ AIDS
2011-2015	48	femal	secundary	59	≤ 200	26	20	IVDU	Yes_ AIDS
2011-2015	49	male	secundary	600	> 200	5	0	unknown	No_AIDS
2011-2015	46	male	secundary	820	> 200	5	127	IVDU	No_AIDS
2011-2015	26	femal	Higher	469	> 200	0	20	unknown	No_AIDS
2011-2015	47	male	secundary	472	> 200	14	0	unknown	Yes_ AIDS
2011-2015	33	femal	secundary	224	> 200	2	118	unknown	Yes_ AIDS
2011-2015	49	femal	secundary	242	> 200	25	20	IVDU	Yes_ AIDS
2011-2015	35	male	secundary	345	> 200	2	32	unknown	Yes_ AIDS
2011-2015	52	male	secundary	243	> 200	8	56	unknown	No_AIDS
2011-2015	77	male	secundary	648	> 200	13	0	unknown	Yes_ AIDS
1993-1997	34	male
1999-2003	34	male
1993-1997	53	femal	Primary	297	> 200	0		sex	Yes_ AIDS
1993-1997	36	femal	secundary	545	> 200	2		sex	No_AIDS
1993-1997	28	male	secundary	460	> 200	1		sex	No_AIDS
1993-1997	27	femal	secundary	360	> 200	2		sex	No_AIDS
1999-2003	42	male	Primary	280	> 200	1		sex	Yes_ AIDS
1999-2003	50	male	Higher	210	> 200	5	0	sex	Yes_ AIDS
1999-2003	53	femal	secundary	650	> 200	1	0	sex	Yes_ AIDS
1999-2003	44	male	Primary	730	> 200	1	0	sex	Yes_ AIDS
1999-2003	63	male	secundary	250	> 200	2		sex	Yes_ AIDS
1999-2003	55	femal	secundary	485	> 200	3	0	sex	Yes_ AIDS
1999-2003	55	male	Higher	450	> 200	1	0	sex	Yes_ AIDS
1999-2003	46	male	secundary	350	> 200	3	0	sex	Yes_ AIDS
1999-2003	30	male	Primary	700	> 200	3	0	sex	Yes_ AIDS
1999-2003	42	male	Higher	307	> 200	2	0	sex	Yes_ AIDS
2011-2015	35	male	Higher	698	> 200	3		sex	No_AIDS
2011-2015	36	male	secundary	564	> 200	3	0	sex	No_AIDS
2011-2015	50	male	secundary	1005	> 200	7	0	sex	No_AIDS
2011-2015	42	femal	secundary	301	> 200	9	0	sex	No_AIDS
2011-2015	58	male	secundary	567	> 200	12	0	sex	Yes_ AIDS
2011-2015	47	male	secundary	499	> 200	3	0	sex	No_AIDS
2011-2015	37	male	Higher	530	> 200	9	0	sex	Yes_ AIDS
2011-2015	42	male	Higher	465	> 200	1	107	sex	Yes_ AIDS
2011-2015	56	male	secundary	172	≤ 200	12	0	sex	Yes_ AIDS
2011-2015	31	male	secundary	559	> 200	4	0	sex	No_AIDS
2011-2015	54	male	Higher	1075	> 200	8	0	sex	No_AIDS
2011-2015	31	male	secundary	691	> 200	5	0	sex	No_AIDS
2011-2015	61	male	Primary	309	> 200	0	20	sex	No_AIDS
2011-2015	34	male	Primary	450	> 200	2	35	sex	Yes_ AIDS
1993-1997	29	male				0		IVDU	No_AIDS
1993-1997	30	femal	Primary	400	> 200	0		IVDU	No_AIDS
1993-1997	40	femal	secundary	230	> 200	0		blood_blood.product	Yes_ AIDS
1993-1997	36	male	Primary	295	> 200	1		IVDU	Yes_ AIDS
1993-1997	36	male	secundary	400	> 200	2		blood_blood.product	No_AIDS
1993-1997	30	femal	secundary	450	> 200	2		IVDU	Yes_ AIDS
1993-1997	36	femal	Higher	350	> 200	0		IVDU	No_AIDS
1999-2003	36	femal	Higher	440	> 200	11		IVDU	No_AIDS
1999-2003	29	male	secundary	305	> 200	1		IVDU	Yes_ AIDS
1999-2003	49	femal	Higher	268	> 200	6	0	unknown	No_AIDS
1999-2003	33	male	Primary	380	> 200	8		unknown	Yes_ AIDS
1999-2003	42	femal	Higher	792	> 200	15	0	IVDU	No_AIDS
1999-2003	56	male	secundary	268	> 200	2	0	unknown	Yes_ AIDS
2011-2015	45	femal	Primary	623	> 200	3	0	unknown	Yes_ AIDS
2011-2015	38	male	secundary	494	> 200	8	0	IVDU	Yes_ AIDS
2011-2015	30	male	secundary	1622	> 200	2	0	unknown	No_AIDS
2011-2015	32	male	secundary	512	> 200	2	0	IVDU	No_AIDS
2011-2015	34	male	secundary	649	> 200	2	0	IVDU	Yes_ AIDS
2011-2015	44	male	secundary	583	> 200	17	0	IVDU	Yes_ AIDS
2011-2015	66	male	secundary	525	> 200	12	0	unknown	Yes_ AIDS
2011-2015	49	femal	Higher	557	> 200	19	38	IVDU	Yes_ AIDS
2011-2015	52	femal	Higher	471	> 200	16	0	IVDU	Yes_ AIDS
2011-2015	45	male	secundary	350	> 200	8	28	IVDU	Yes_ AIDS
2011-2015	39	femal	secundary	338	> 200	2	0	blood_blood.product	No_AIDS
2011-2015	36	male	secundary	35	≤ 200	0	21000	unknown	Yes_ AIDS
2011-2015	31	male	secundary	435	> 200	5	0	unknown	Yes_ AIDS
2011-2015	38	male	secundary	367	> 200	11	37	unknown	Yes_ AIDS
2011-2015	32	femal	secundary	432	> 200	9	0	unknown	No_AIDS
2011-2015	54	male	Primary	545	> 200	28	45	blood_blood.product	Yes_ AIDS
2011-2015	51	femal	Higher	596	> 200	15	126	unknown	Yes_ AIDS
2011-2015	53	femal	secundary	345	> 200	11	22	blood_blood.product	Yes_ AIDS

## Sheet: Table 2
ART_year_group	HIV_risk_behavior
1993-1997	sex
1993-1997	msm
1993-1997	sex
1993-1997	msm
1993-1997	sex
1993-1997	sex
1993-1997	bisex
1993-1997	msm
1993-1997	bisex
1993-1997	sex
1993-1997	bisex
1999-2003	msm
1999-2003	sex
1999-2003	sex
1999-2003	sex
1999-2003	bisex
1999-2003	msm
1999-2003	sex
1999-2003	sex
1999-2003	sex
1999-2003	sex
1999-2003	sex
1999-2003	sex
1999-2003	sex
1999-2003	bisex
1999-2003	sex
1999-2003	bisex
1999-2003	sex
1999-2003	bisex
2011-2015	sex
2011-2015	msm
2011-2015	msm
2011-2015	msm
2011-2015	msm
2011-2015	sex
2011-2015	msm
2011-2015	sex
2011-2015	sex
2011-2015	msm
2011-2015	msm
2011-2015	sex
2011-2015	sex
2011-2015	sex
2011-2015	sex
2011-2015	sex
2011-2015	msm
2011-2015	msm
2011-2015	msm
2011-2015	sex
2011-2015	sex
2011-2015	sex
2011-2015	sex
2011-2015	sex
2011-2015	msm
2011-2015	msm
2011-2015	msm
2011-2015	msm
2011-2015	sex
2011-2015	sex
2011-2015	sex
2011-2015	sex
2011-2015	msm
2011-2015	sex
2011-2015	msm
2011-2015	sex
2011-2015	sex
2011-2015	sex
2011-2015	msm
2011-2015	sex
2011-2015	msm
2011-2015	msm
2011-2015	msm
1993-1997	sex
1993-1997	sex
1993-1997	sex
1993-1997	sex
1999-2003	sex
1999-2003	bisex
1999-2003	sex
1999-2003	sex
1999-2003	sex
1999-2003	sex
1999-2003	sex
1999-2003	msm
1999-2003	sex
1999-2003	msm
2011-2015	msm
2011-2015	msm
2011-2015	sex
2011-2015	sex
2011-2015	sex
2011-2015	sex
2011-2015	msm
2011-2015	msm
2011-2015	msm
2011-2015	msm
2011-2015	sex
2011-2015	sex
2011-2015	sex
2011-2015	sex

## Sheet: Table 3
ART_year_group	Helicobacter_pilori	EGD_findings_nominal	Histology_findings_topography	HP_Hp_density_recode	HP_A_activity_recode	HP_LF_recode	HP_At_atrophy_recode	HP_IM_recode
1993-1997	negative	normal finding
1993-1997	negative	pathology finding
1993-1997	negative	pathology finding
1993-1997	negative	pathology finding
1993-1997	negative	pathology finding
1993-1997	negative	pathology finding
1993-1997	negative	normal finding
1993-1997	negative	normal finding
1999-2003	negative	normal finding
1999-2003	negative	normal finding
1999-2003	negative	normal finding
1999-2003	negative	normal finding
1993-1997	negative	pathology finding
1993-1997	negative	pathology finding
1993-1997	negative	normal finding
1993-1997	negative	pathology finding
1993-1997	negative	pathology finding
1993-1997	negative	pathology finding
1993-1997	negative	pathology finding
1993-1997	negative	normal finding
1993-1997	negative	pathology finding
1993-1997	negative	pathology finding
1993-1997	negative	normal finding
1999-2003	negative	pathology finding
1999-2003	negative	normal finding
1999-2003	negative	pathology finding
1999-2003	negative	pathology finding
1999-2003	negative	normal finding
1999-2003	negative	normal finding
1999-2003	negative	normal finding
1999-2003	negative	pathology finding
1999-2003	negative	pathology finding
1999-2003	negative	normal finding
1999-2003	negative	normal finding
1999-2003	negative	pathology finding
1999-2003	negative	normal finding
1999-2003	negative	pathology finding
1999-2003	negative	pathology finding
1999-2003	negative	normal finding
1999-2003	negative	pathology finding
1999-2003	negative	normal finding
2011-2015	negative	normal finding
2011-2015	negative	normal finding
2011-2015	negative	normal finding
2011-2015	negative	normal finding
2011-2015	negative	normal finding
2011-2015	negative	normal finding
2011-2015	negative	pathology finding
2011-2015	negative	normal finding
2011-2015	negative	normal finding
2011-2015	negative	normal finding
2011-2015	negative	normal finding
2011-2015	negative	pathology finding
2011-2015	negative	normal finding
2011-2015	negative	normal finding
2011-2015	negative	normal finding
2011-2015	negative	normal finding
2011-2015	negative	normal finding
2011-2015	negative	normal finding
2011-2015	negative	normal finding
2011-2015	negative	normal finding
2011-2015	negative	normal finding
2011-2015	negative	normal finding
2011-2015	negative	normal finding
2011-2015	negative	pathology finding
2011-2015	negative	normal finding
2011-2015	negative	normal finding
2011-2015	negative	pathology finding
2011-2015	negative	pathology finding
2011-2015	negative	pathology finding
2011-2015	negative	normal finding
2011-2015	negative	normal finding
2011-2015	negative	normal finding
2011-2015	negative	normal finding
2011-2015	negative	normal finding
2011-2015	negative	pathology finding
2011-2015	negative	normal finding
2011-2015	negative	normal finding
2011-2015	negative	pathology finding
2011-2015	negative	pathology finding
2011-2015	negative	normal finding
2011-2015	negative	pathology finding
2011-2015	negative	normal finding
2011-2015	negative	normal finding
1993-1997	negative	pathology finding
1993-1997	negative	pathology finding
1993-1997	negative	pathology finding
1993-1997	negative	pathology finding
1993-1997	negative	pathology finding
1993-1997	negative	pathology finding
1993-1997	negative	pathology finding
1993-1997	negative	pathology finding
1993-1997	negative	pathology finding
1993-1997	negative	normal finding
1993-1997	negative	pathology finding
1993-1997	negative	pathology finding
1993-1997	negative	pathology finding
1993-1997	negative	normal finding
1993-1997	negative	normal finding
1993-1997	negative	pathology finding
1993-1997	negative	pathology finding
1993-1997	negative	pathology finding
1993-1997	negative	normal finding
1993-1997	negative	normal finding
1993-1997	negative	pathology finding
1993-1997	negative	normal finding
1993-1997	negative	normal finding
1993-1997	negative	pathology finding
1993-1997	negative	pathology finding
1993-1997	negative	normal finding
1993-1997	negative	pathology finding
1993-1997	negative	normal finding
1993-1997	negative	normal finding
1993-1997	negative	pathology finding
1993-1997	negative	pathology finding
1993-1997	negative	pathology finding
1993-1997	negative	pathology finding
1993-1997	negative	pathology finding
1993-1997	negative	pathology finding
1999-2003	negative	normal finding
1999-2003	negative	normal finding
1999-2003	negative	normal finding
1999-2003	negative	normal finding
1999-2003	negative	normal finding
1999-2003	negative	normal finding
1999-2003	negative	normal finding
1999-2003	negative	normal finding
1999-2003	negative	pathology finding
1999-2003	negative	normal finding
1999-2003	negative	pathology finding
1999-2003	negative	pathology finding
1999-2003	negative	normal finding
1999-2003	negative	pathology finding
2011-2015	negative	normal finding
2011-2015	negative	normal finding
2011-2015	negative	pathology finding
2011-2015	negative	pathology finding
2011-2015	negative	normal finding
2011-2015	negative	pathology finding
2011-2015	negative	pathology finding
2011-2015	negative	normal finding
2011-2015	negative	normal finding
2011-2015	negative	normal finding
2011-2015	negative	pathology finding
2011-2015	negative	normal finding
2011-2015	negative	normal finding
2011-2015	negative	normal finding
2011-2015	negative	normal finding
2011-2015	negative	pathology finding
2011-2015	negative	normal finding
2011-2015	negative	pathology finding
1993-1997	positive	pathology finding	pangastritis	+++	+++	negative	negative	negative
1999-2003	positive	pathology finding	pangastritis	++	negative	negative	negative	negative
1993-1997	positive	pathology finding	antrum gastritis	+++	negative	negative	negative	negative
1993-1997	positive	pathology finding	antrum gastritis	++	+	+	negative	negative
1993-1997	positive	pathology finding	antrum gastritis	++	+	negative	negative	negative
1993-1997	positive	normal finding	antrum gastritis	+	+	negative	negative	negative
1999-2003	positive	pathology finding	pangastritis	++	+	negative	negative	negative
1999-2003	positive	pathology finding	pangastritis	++	+++	+	negative	negative
1999-2003	positive	pathology finding	antrum gastritis	+	+	negative	negative	negative
1999-2003	positive	pathology finding	antrum gastritis	+	++	negative	negative	negative
1999-2003	positive	pathology finding	antrum gastritis	+	+	negative	negative	negative
1999-2003	positive	pathology finding	body gastritis	+	+	negative	negative	negative
1999-2003	positive	pathology finding	body gastritis	+	+	negative	negative	negative
1999-2003	positive	pathology finding	antrum gastritis	+	+	negative	negative	negative
1999-2003	positive	pathology finding	antrum gastritis	+	++	+	negative	negative
1999-2003	positive	pathology finding	antrum gastritis	++	+	negative	negative	negative
2011-2015	positive	normal finding	antrum gastritis	++	+	negative	negative	negative
2011-2015	positive	pathology finding	pangastritis	+++	+	negative	negative	negative
2011-2015	positive	pathology finding	pangastritis	+++	+++	negative	negative	negative
2011-2015	positive	normal finding	pangastritis	+++	++	+	negative	+
2011-2015	positive	normal finding	pangastritis	+++	++	negative	negative	+
2011-2015	positive	normal finding	pangastritis	++	++	+	negative	negative
2011-2015	positive	pathology finding	pangastritis	++	+	negative	negative	negative
2011-2015	positive	pathology finding	antrum gastritis	+++	++	negative	negative	negative
2011-2015	positive	pathology finding	pangastritis	+++	++	+	negative	negative
2011-2015	positive	pathology finding	pangastritis	+++	++	negative	negative	negative
2011-2015	positive	pathology finding	antrum gastritis	++	+	negative	negative	negative
2011-2015	positive	pathology finding	antrum gastritis	+	+	negative	negative	negative
2011-2015	positive	pathology finding	pangastritis	+++	++	+	negative	+
2011-2015	positive	normal finding	pangastritis	+	++	+	negative	negative
1993-1997	positive	pathology finding	antrum gastritis	+	+	negative	negative	negative
1993-1997	positive	pathology finding	antrum gastritis	+	negative	+	negative	negative
1993-1997	positive	pathology finding	antrum gastritis	+	+	negative	negative	negative
1993-1997	positive	pathology finding	antrum gastritis	+	++	negative	negative	negative
1993-1997	positive	pathology finding	antrum gastritis	+++	+	negative	negative	+
1993-1997	positive	pathology finding	antrum gastritis	++	+	+	negative	negative
1993-1997	positive	pathology finding	antrum gastritis	++	+	negative	negative	negative
1999-2003	positive	pathology finding	antrum gastritis	+	++	negative	negative	negative
1999-2003	positive	pathology finding	pangastritis	++	++	negative	negative	negative
1999-2003	negative	pathology finding
1999-2003	positive	pathology finding	pangastritis	+	+	negative	negative	negative
1999-2003	positive	normal finding	pangastritis	++	+	negative	negative	negative
1999-2003	positive	normal finding	pangastritis	+	+	negative	negative	+
2011-2015	positive	pathology finding	pangastritis	++	++	++	negative	+
2011-2015	positive	normal finding	pangastritis	+++	+	negative	negative	negative
2011-2015	positive	pathology finding	antrum gastritis	++	+	negative	negative	negative
2011-2015	positive	pathology finding	antrum gastritis	+++	+	negative	negative	negative
2011-2015	positive	pathology finding	pangastritis	+++	+++	negative	negative	negative
2011-2015	positive	pathology finding	pangastritis	+++	++	negative	negative	+
2011-2015	positive	pathology finding	pangastritis	+	+	negative	negative	negative
2011-2015	positive	normal finding	pangastritis	+	++	negative	negative	negative
2011-2015	positive	pathology finding	pangastritis	+++	+++	negative	negative	+
2011-2015	positive	pathology finding	antrum gastritis	+++	+++	negative	negative	negative
2011-2015	positive	pathology finding	pangastritis	++	+	+	negative	negative
2011-2015	positive	normal finding	antrum gastritis	++	+	+	negative	+
2011-2015	positive	pathology finding	pangastritis	+++	+	negative	negative	negative
2011-2015	positive	normal finding	pangastritis	++	+	+	negative	negative
2011-2015	positive	normal finding	pangastritis	++	+	+	negative	negative
2011-2015	positive	normal finding	pangastritis	+++	++	negative	negative	negative
2011-2015	positive	pathology finding	antrum gastritis	+	+	++	negative	negative
2011-2015	positive	pathology finding	pangastritis	+++	+	negative	negative	+

## Sheet: Table 4
ART_year_group	Ages	gender	CD4_count_EGD	Helicobacter_pilori
1993-1997	34	male		positive
1999-2003	34	male		positive
1993-1997	53	femal	297	positive
1993-1997	36	femal	545	positive
1993-1997	28	male	460	positive
1993-1997	27	femal	360	positive
1999-2003	42	male	280	positive
1999-2003	50	male	210	positive
1999-2003	53	femal	650	positive
1999-2003	44	male	730	positive
1999-2003	63	male	250	positive
1999-2003	55	femal	485	positive
1999-2003	55	male	450	positive
1999-2003	46	male	350	positive
1999-2003	30	male	700	positive
1999-2003	42	male	307	positive
2011-2015	35	male	698	positive
2011-2015	36	male	564	positive
2011-2015	50	male	1005	positive
2011-2015	42	femal	301	positive
2011-2015	58	male	567	positive
2011-2015	47	male	499	positive
2011-2015	37	male	530	positive
2011-2015	42	male	465	positive
2011-2015	56	male	172	positive
2011-2015	31	male	559	positive
2011-2015	54	male	1075	positive
2011-2015	31	male	691	positive
2011-2015	61	male	309	positive
2011-2015	34	male	450	positive
1993-1997	29	male		positive
1993-1997	30	femal	400	positive
1993-1997	40	femal	230	positive
1993-1997	36	male	295	positive
1993-1997	36	male	400	positive
1993-1997	30	femal	450	positive
1993-1997	36	femal	350	positive
1999-2003	36	femal	440	positive
1999-2003	29	male	305	positive
1999-2003	33	male	380	positive
1999-2003	42	femal	792	positive
1999-2003	56	male	268	positive
2011-2015	45	femal	623	positive
2011-2015	38	male	494	positive
2011-2015	30	male	1622	positive
2011-2015	32	male	512	positive
2011-2015	34	male	649	positive
2011-2015	44	male	583	positive
2011-2015	66	male	525	positive
2011-2015	49	femal	557	positive
2011-2015	52	femal	471	positive
2011-2015	45	male	350	positive
2011-2015	39	femal	338	positive
2011-2015	36	male	35	positive
2011-2015	31	male	435	positive
2011-2015	38	male	367	positive
2011-2015	32	femal	432	positive
2011-2015	54	male	545	positive
2011-2015	51	femal	596	positive
2011-2015	53	femal	345	positive

## Sheet: Table 5
ART_year_group	Helicobacter_pilori	Ages
1993-1997	negative	67
1993-1997	negative	66
1993-1997	negative	73
1993-1997	negative	18
1993-1997	negative	30
1993-1997	negative	27
1993-1997	negative	29
1993-1997	negative	27
1993-1997	negative	56
1993-1997	negative	32
1993-1997	negative	86
1993-1997	negative	33
1993-1997	negative	55
1993-1997	negative	41
1993-1997	negative	45
1993-1997	negative	38
1993-1997	negative	60
1993-1997	negative	42
1993-1997	negative	51
1993-1997	negative	24
1993-1997	negative	47
1993-1997	negative	54
1993-1997	negative	30
1993-1997	negative	41
1993-1997	negative	57
1993-1997	negative	79
1993-1997	negative	43
1993-1997	negative	36
1993-1997	negative	41
1993-1997	negative	34
1993-1997	negative	33
1993-1997	negative	21
1993-1997	negative	22
1993-1997	negative	75
1993-1997	negative	35
1993-1997	negative	53
1993-1997	negative	71
1993-1997	negative	60
1993-1997	positive	52
1993-1997	positive	42
1993-1997	positive	83
1993-1997	positive	55
1993-1997	positive	48
1993-1997	positive	73
1993-1997	positive	37
1993-1997	positive	65
1993-1997	positive	38
1993-1997	positive	33
1993-1997	positive	39
1993-1997	positive	55
1993-1997	positive	60
1993-1997	positive	63
1993-1997	positive	44
1993-1997	positive	65
1993-1997	positive	48
1993-1997	positive	67
1993-1997	positive	60
1993-1997	positive	35
1993-1997	positive	40
1993-1997	positive	39
1993-1997	positive	40
1993-1997	positive	64
1993-1997	positive	58
1993-1997	positive	39
1993-1997	positive	37
1993-1997	positive	23
1993-1997	positive	39
1993-1997	positive	38
1993-1997	positive	52
1993-1997	positive	28
1993-1997	positive	64
1993-1997	positive	63
1993-1997	positive	46
1993-1997	positive	39
1993-1997	positive	38
1993-1997	positive	37
1993-1997	positive	40
1993-1997	positive	33
1993-1997	positive	33
1993-1997	positive	51
1993-1997	positive	35
1993-1997	positive	43
1993-1997	positive	42
1993-1997	positive	52
1993-1997	positive	26
1993-1997	positive	52
1993-1997	positive	42
1993-1997	positive	34
1993-1997	positive	38
1993-1997	positive	31
1993-1997	positive	23
1993-1997	positive	23
1993-1997	positive	65
1993-1997	positive	50
1993-1997	positive	61
1993-1997	positive	31
1993-1997	positive	44
1993-1997	positive	34
1993-1997	positive	50
1993-1997	positive	34
1993-1997	positive	73
1993-1997	positive	37
1993-1997	positive	54
1993-1997	positive	47
1993-1997	positive	53
1993-1997	positive	37
1993-1997	positive	66
1993-1997	positive	63
1993-1997	positive	68
1993-1997	positive	34
1993-1997	positive	42
1993-1997	positive	42
1993-1997	positive	65
1993-1997	negative	45
1993-1997	negative	26
1993-1997	negative	34
1993-1997	negative	47
1993-1997	negative	58
1993-1997	negative	29
1993-1997	negative	55
1993-1997	negative	54
1993-1997	negative	29
1993-1997	negative	23
1993-1997	negative	43
1993-1997	negative	42
1993-1997	negative	56
1993-1997	negative	24
1993-1997	negative	18
1993-1997	negative	33
1993-1997	negative	41
1993-1997	negative	70
1993-1997	negative	74
1993-1997	negative	54
1993-1997	negative	30
1993-1997	negative	27
1993-1997	negative	38
1993-1997	negative	31
1993-1997	negative	25
1993-1997	negative	23
1993-1997	negative	58
1993-1997	negative	42
1993-1997	negative	61
1993-1997	negative	50
1993-1997	negative	51
1993-1997	negative	24
1993-1997	negative	43
1993-1997	negative	25
1993-1997	negative	28
1993-1997	negative	54
1993-1997	negative	28
1993-1997	negative	35
1993-1997	negative	54
1993-1997	negative	44
1993-1997	negative	28
1993-1997	negative	32
1993-1997	negative	43
1993-1997	negative	25
1993-1997	positive	41
1993-1997	positive	36
1993-1997	positive	19
1993-1997	positive	25
1993-1997	positive	39
1993-1997	positive	44
1993-1997	positive	28
1993-1997	positive	65
1993-1997	positive	48
1993-1997	positive	44
1993-1997	positive	61
1993-1997	positive	38
1993-1997	positive	65
1993-1997	positive	62
1993-1997	positive	46
1993-1997	positive	23
1993-1997	positive	39
1993-1997	positive	38
1993-1997	positive	40
1993-1997	positive	42
1993-1997	positive	40
1993-1997	positive	36
1993-1997	positive	43
1993-1997	positive	40
1993-1997	positive	30
1993-1997	positive	41
1993-1997	positive	69
1993-1997	positive	46
1993-1997	positive	71
1993-1997	positive	64
1993-1997	positive	43
1993-1997	positive	49
1993-1997	positive	58
1993-1997	positive	51
1993-1997	positive	53
1993-1997	positive	51
1993-1997	positive	28
1993-1997	positive	63
1993-1997	positive	42
1993-1997	positive	55
1993-1997	positive	31
1993-1997	positive	48
1993-1997	positive	50
1993-1997	positive	72
1993-1997	positive	69
1993-1997	positive	18
1993-1997	positive	57
1993-1997	positive	43
1993-1997	positive	74
1993-1997	positive	23
1993-1997	positive	57
1993-1997	positive	39
1993-1997	positive	60
1993-1997	positive	34
1993-1997	positive	39
1993-1997	positive	40
1993-1997	positive	44
1993-1997	positive	51
1993-1997	positive	33
1993-1997	positive	21
1993-1997	positive	35
1993-1997	positive	54
1993-1997	positive	31
1993-1997	positive	34
1993-1997	positive	25
1993-1997	positive	36
1993-1997	positive	43
1993-1997	positive	21
1993-1997	positive	33
1993-1997	positive	85
1993-1997	positive	35
1993-1997	positive	52
1993-1997	positive	62
1993-1997	positive	45
1993-1997	positive	46
1993-1997	positive	34
1993-1997	positive	33
1993-1997	positive	38
1993-1997	positive	43
1993-1997	positive	50
1993-1997	positive	52
1993-1997	positive	48
1993-1997	positive	40
1993-1997	positive	18
1993-1997	positive	37
1993-1997	positive	39
1993-1997	positive	46
1993-1997	negative	63
1993-1997	negative	68
1993-1997	negative	46
1993-1997	negative	45
1993-1997	negative	25
1993-1997	negative	19
1993-1997	negative	71
1993-1997	negative	39
1993-1997	negative	52
1993-1997	negative	77
1993-1997	negative	40
1993-1997	negative	24
1993-1997	negative	37
1993-1997	negative	31
1993-1997	negative	36
1993-1997	negative	41
1993-1997	negative	42
1993-1997	negative	21
1993-1997	negative	38
1993-1997	negative	57
1993-1997	negative	39
1993-1997	negative	20
1993-1997	negative	42
1993-1997	negative	35
1993-1997	negative	36
1993-1997	negative	40
1993-1997	negative	65
1993-1997	negative	57
1993-1997	negative	19
1993-1997	negative	22
1993-1997	negative	41
1993-1997	negative	24
1993-1997	negative	68
1993-1997	negative	27
1993-1997	negative	67
1993-1997	negative	51
1993-1997	negative	45
1993-1997	negative	30
1993-1997	negative	27
1993-1997	negative	45
1993-1997	negative	40
1993-1997	negative	19
1993-1997	positive	44
1993-1997	positive	21
1993-1997	positive	27
1993-1997	positive	25
1993-1997	positive	64
1993-1997	positive	26
1993-1997	positive	32
1993-1997	positive	44
1993-1997	positive	41
1993-1997	positive	29
1993-1997	positive	54
1993-1997	positive	45
1993-1997	positive	36
1993-1997	positive	30
1993-1997	positive	39
1993-1997	positive	52
1993-1997	positive	48
1993-1997	positive	44
1993-1997	positive	44
1993-1997	positive	63
1993-1997	positive	53
1993-1997	positive	71
1993-1997	positive	47
1993-1997	positive	62
1993-1997	positive	19
1993-1997	positive	29
1993-1997	positive	58
1993-1997	positive	53
1993-1997	positive	35
1993-1997	positive	48
1993-1997	positive	41
1993-1997	positive	30
1993-1997	positive	59
1993-1997	positive	23
1993-1997	positive	57
1993-1997	positive	42
1993-1997	positive	64
1993-1997	positive	28
1993-1997	positive	54
1993-1997	positive	49
1993-1997	positive	36
1993-1997	positive	26
1993-1997	positive	63
1993-1997	positive	56
1993-1997	positive	74
1993-1997	positive	29
1993-1997	positive	35
1993-1997	positive	42
1993-1997	positive	35
1993-1997	positive	61
1993-1997	positive	46
1993-1997	positive	20
1993-1997	positive	44
1993-1997	positive	53
1993-1997	positive	42
1993-1997	positive	48
1993-1997	positive	57
1993-1997	positive	21
1993-1997	positive	75
1993-1997	positive	63
1993-1997	positive	38
1993-1997	positive	37
1993-1997	positive	33
1993-1997	positive	36
1993-1997	positive	56
1993-1997	positive	37
1993-1997	positive	37
1993-1997	positive	44
1993-1997	positive	55
1993-1997	positive	67
1993-1997	positive	67
1993-1997	positive	22
1993-1997	positive	34
1993-1997	negative	30
1993-1997	negative	68
1993-1997	negative	45
1993-1997	negative	52
1993-1997	negative	21
1993-1997	negative	27
1993-1997	negative	41
1993-1997	negative	69
1993-1997	negative	46
1993-1997	negative	38
1993-1997	negative	73
1993-1997	negative	68
1993-1997	negative	63
1993-1997	negative	42
1993-1997	negative	22
1993-1997	negative	38
1993-1997	negative	22
1993-1997	negative	23
1993-1997	negative	41
1993-1997	negative	28
1993-1997	negative	30
1993-1997	negative	31
1993-1997	negative	27
1993-1997	negative	73
1993-1997	negative	61
1993-1997	negative	41
1993-1997	negative	26
1993-1997	negative	44
1993-1997	negative	68
1993-1997	negative	37
1993-1997	negative	72
1993-1997	negative	24
1993-1997	negative	63
1993-1997	negative	33
1993-1997	negative	42
1993-1997	negative	62
1993-1997	negative	43
1993-1997	negative	24
1993-1997	negative	35
1993-1997	negative	41
1993-1997	negative	41
1993-1997	negative	51
1993-1997	negative	43
1993-1997	negative	40
1993-1997	negative	46
1993-1997	negative	47
1993-1997	negative	35
1993-1997	negative	41
1993-1997	negative	41
1993-1997	negative	35
1993-1997	negative	54
1993-1997	negative	35
1993-1997	negative	47
1993-1997	negative	58
1993-1997	negative	28
1993-1997	negative	34
1993-1997	negative	23
1993-1997	negative	76
1993-1997	negative	40
1993-1997	negative	65
1993-1997	negative	37
1993-1997	negative	35
1993-1997	negative	37
1993-1997	negative	38
1993-1997	negative	31
1993-1997	negative	26
1993-1997	negative	69
1993-1997	negative	26
1993-1997	positive	44
1993-1997	positive	51
1993-1997	positive	48
1993-1997	positive	43
1993-1997	positive	36
1993-1997	positive	34
1993-1997	positive	59
1993-1997	positive	59
1993-1997	positive	39
1993-1997	positive	62
1993-1997	positive	43
1993-1997	positive	47
1993-1997	positive	43
1993-1997	positive	68
1993-1997	positive	40
1993-1997	positive	62
1993-1997	positive	42
1993-1997	positive	44
1993-1997	positive	49
1993-1997	positive	51
1993-1997	positive	65
1993-1997	positive	64
1993-1997	positive	68
1993-1997	positive	76
1993-1997	positive	44
1993-1997	positive	37
1993-1997	positive	37
1993-1997	positive	41
1993-1997	positive	23
1993-1997	positive	44
1993-1997	positive	60
1993-1997	positive	35
1993-1997	positive	38
1993-1997	positive	48
1993-1997	positive	49
1993-1997	positive	35
1993-1997	positive	61
1993-1997	positive	37
1993-1997	positive	44
1993-1997	positive	58
1993-1997	positive	32
1993-1997	positive	52
1993-1997	positive	45
1993-1997	positive	57
1993-1997	positive	65
1993-1997	positive	40
1993-1997	positive	44
1993-1997	positive	30
1993-1997	positive	63
1993-1997	positive	34
1993-1997	positive	61
1993-1997	positive	38
1993-1997	positive	37
1993-1997	positive	42
1993-1997	positive	32
1993-1997	positive	33
1993-1997	positive	24
1993-1997	positive	78
1993-1997	positive	60
1993-1997	positive	24
1993-1997	positive	45
1993-1997	positive	47
1993-1997	positive	41
1993-1997	positive	35
1993-1997	positive	56
1993-1997	positive	28
1993-1997	positive	65
1993-1997	positive	44
1993-1997	positive	52
1993-1997	positive	38
1993-1997	positive	30
1993-1997	positive	77
1993-1997	positive	73
1993-1997	positive	29
1993-1997	positive	49
1993-1997	positive	24
1993-1997	positive	35
1993-1997	positive	43
1993-1997	positive	46
1993-1997	positive	66
1993-1997	positive	49
1993-1997	positive	27
1993-1997	positive	41
1993-1997	positive	32
1993-1997	positive	30
1993-1997	negative	58
1993-1997	negative	49
1993-1997	negative	60
1993-1997	negative	42
1993-1997	negative	61
1993-1997	negative	25
1993-1997	negative	48
1993-1997	negative	56
1993-1997	negative	19
1993-1997	negative	48
1993-1997	negative	65
1993-1997	negative	62
1993-1997	negative	46
1993-1997	negative	62
1993-1997	negative	47
1993-1997	negative	30
1993-1997	negative	48
1993-1997	negative	57
1993-1997	negative	43
1993-1997	negative	65
1993-1997	negative	40
1993-1997	negative	48
1993-1997	negative	31
1993-1997	negative	43
1993-1997	negative	47
1993-1997	negative	53
1993-1997	negative	21
1993-1997	negative	55
1993-1997	negative	42
1993-1997	negative	43
1993-1997	negative	47
1993-1997	negative	62
1993-1997	negative	54
1993-1997	negative	29
1993-1997	negative	51
1993-1997	negative	57
1993-1997	negative	77
1993-1997	negative	69
1993-1997	negative	43
1993-1997	negative	34
1993-1997	negative	34
1993-1997	negative	27
1993-1997	negative	33
1993-1997	positive	42
1993-1997	positive	40
1993-1997	positive	62
1993-1997	positive	26
1993-1997	positive	35
1993-1997	positive	37
1993-1997	positive	37
1993-1997	positive	60
1993-1997	positive	53
1993-1997	positive	45
1993-1997	positive	25
1993-1997	positive	45
1993-1997	positive	27
1993-1997	positive	40
1993-1997	positive	56
1993-1997	positive	55
1993-1997	positive	50
1993-1997	positive	60
1993-1997	positive	67
1993-1997	positive	41
1993-1997	positive	54
1993-1997	positive	31
1993-1997	positive	41
1993-1997	positive	37
1993-1997	positive	34
1993-1997	positive	41
1993-1997	positive	50
1993-1997	positive	39
1993-1997	positive	37
1993-1997	positive	46
1993-1997	positive	45
1993-1997	positive	47
1993-1997	positive	58
1993-1997	positive	59
1993-1997	positive	53
1993-1997	positive	42
1993-1997	positive	45
1993-1997	positive	69
1993-1997	positive	22
1993-1997	positive	42
1993-1997	positive	72
1993-1997	positive	59
1993-1997	positive	49
1999-2003	negative	53
1999-2003	negative	67
1999-2003	negative	51
1999-2003	negative	36
1999-2003	negative	25
1999-2003	negative	34
1999-2003	negative	43
1999-2003	negative	73
1999-2003	negative	50
1999-2003	negative	56
1999-2003	negative	37
1999-2003	negative	42
1999-2003	negative	51
1999-2003	negative	45
1999-2003	negative	67
1999-2003	negative	56
1999-2003	negative	32
1999-2003	negative	35
1999-2003	negative	57
1999-2003	negative	37
1999-2003	negative	37
1999-2003	negative	57
1999-2003	negative	45
1999-2003	negative	39
1999-2003	negative	52
1999-2003	negative	22
1999-2003	negative	64
1999-2003	negative	41
1999-2003	negative	65
1999-2003	negative	74
1999-2003	negative	47
1999-2003	negative	45
1999-2003	negative	72
1999-2003	negative	67
1999-2003	negative	56
1999-2003	negative	19
1999-2003	negative	43
1999-2003	negative	56
1999-2003	negative	45
1999-2003	negative	68
1999-2003	negative	33
1999-2003	negative	41
1999-2003	negative	69
1999-2003	positive	19
1999-2003	positive	45
1999-2003	positive	53
1999-2003	positive	36
1999-2003	positive	29
1999-2003	positive	42
1999-2003	positive	29
1999-2003	positive	57
1999-2003	positive	47
1999-2003	positive	53
1999-2003	positive	56
1999-2003	positive	22
1999-2003	positive	47
1999-2003	positive	42
1999-2003	positive	48
1999-2003	positive	30
1999-2003	positive	41
1999-2003	positive	49
1999-2003	positive	37
1999-2003	positive	47
1999-2003	positive	45
1999-2003	positive	59
1999-2003	positive	62
1999-2003	positive	48
1999-2003	positive	44
1999-2003	positive	46
1999-2003	positive	44
1999-2003	positive	52
1999-2003	positive	38
1999-2003	positive	29
1999-2003	positive	62
1999-2003	positive	49
1999-2003	positive	42
1999-2003	positive	50
1999-2003	positive	65
1999-2003	positive	53
1999-2003	positive	22
1999-2003	positive	41
1999-2003	positive	34
1999-2003	positive	54
1999-2003	positive	42
1999-2003	positive	47
1999-2003	positive	22
1999-2003	positive	46
1999-2003	positive	36
1999-2003	positive	39
1999-2003	positive	52
1999-2003	positive	48
1999-2003	positive	57
1999-2003	positive	49
1999-2003	positive	40
1999-2003	positive	39
1999-2003	positive	40
1999-2003	positive	45
1999-2003	positive	59
1999-2003	positive	49
1999-2003	positive	53
1999-2003	positive	52
1999-2003	positive	35
1999-2003	positive	51
1999-2003	positive	51
1999-2003	positive	53
1999-2003	positive	45
1999-2003	positive	51
1999-2003	positive	33
1999-2003	positive	29
1999-2003	positive	36
1999-2003	positive	52
1999-2003	positive	77
1999-2003	positive	60
1999-2003	positive	40
1999-2003	positive	24
1999-2003	positive	24
1999-2003	positive	63
1999-2003	positive	39
1999-2003	positive	45
1999-2003	positive	56
1999-2003	positive	52
1999-2003	negative	30
1999-2003	negative	28
1999-2003	negative	25
1999-2003	negative	24
1999-2003	negative	29
1999-2003	negative	57
1999-2003	negative	46
1999-2003	negative	23
1999-2003	negative	35
1999-2003	negative	33
1999-2003	negative	32
1999-2003	negative	36
1999-2003	negative	36
1999-2003	negative	31
1999-2003	negative	52
1999-2003	negative	44
1999-2003	negative	61
1999-2003	negative	35
1999-2003	negative	45
1999-2003	negative	21
1999-2003	negative	21
1999-2003	negative	59
1999-2003	negative	38
1999-2003	negative	66
1999-2003	negative	35
1999-2003	negative	42
1999-2003	negative	36
1999-2003	negative	40
1999-2003	negative	20
1999-2003	negative	38
1999-2003	negative	69
1999-2003	negative	45
1999-2003	negative	53
1999-2003	negative	45
1999-2003	negative	29
1999-2003	negative	26
1999-2003	negative	52
1999-2003	negative	52
1999-2003	negative	23
1999-2003	negative	38
1999-2003	negative	27
1999-2003	negative	75
1999-2003	negative	58
1999-2003	negative	60
1999-2003	negative	34
1999-2003	negative	66
1999-2003	negative	22
1999-2003	negative	24
1999-2003	negative	61
1999-2003	negative	50
1999-2003	negative	66
1999-2003	negative	68
1999-2003	negative	44
1999-2003	negative	71
1999-2003	negative	25
1999-2003	negative	43
1999-2003	negative	64
1999-2003	negative	48
1999-2003	negative	22
1999-2003	negative	70
1999-2003	negative	50
1999-2003	negative	35
1999-2003	negative	30
1999-2003	negative	46
1999-2003	negative	28
1999-2003	negative	44
1999-2003	negative	50
1999-2003	negative	20
1999-2003	negative	56
1999-2003	negative	25
1999-2003	negative	30
1999-2003	negative	65
1999-2003	negative	28
1999-2003	negative	44
1999-2003	positive	33
1999-2003	positive	24
1999-2003	positive	61
1999-2003	positive	66
1999-2003	positive	45
1999-2003	positive	54
1999-2003	positive	33
1999-2003	positive	55
1999-2003	positive	55
1999-2003	positive	32
1999-2003	positive	34
1999-2003	positive	35
1999-2003	positive	50
1999-2003	positive	61
1999-2003	positive	68
1999-2003	positive	43
1999-2003	positive	52
1999-2003	positive	33
1999-2003	positive	31
1999-2003	positive	58
1999-2003	positive	56
1999-2003	positive	27
1999-2003	positive	57
1999-2003	positive	60
1999-2003	positive	47
1999-2003	positive	54
1999-2003	positive	34
1999-2003	positive	41
1999-2003	positive	52
1999-2003	positive	47
1999-2003	positive	45
1999-2003	positive	55
1999-2003	positive	56
1999-2003	positive	58
1999-2003	positive	55
1999-2003	positive	53
1999-2003	positive	41
1999-2003	positive	57
1999-2003	positive	50
1999-2003	positive	36
1999-2003	positive	43
1999-2003	positive	70
1999-2003	positive	27
1999-2003	positive	53
1999-2003	positive	51
1999-2003	positive	53
1999-2003	positive	42
1999-2003	positive	55
1999-2003	positive	41
1999-2003	positive	34
1999-2003	positive	51
1999-2003	positive	40
1999-2003	positive	31
1999-2003	positive	43
1999-2003	positive	40
1999-2003	positive	37
1999-2003	positive	59
1999-2003	positive	39
1999-2003	positive	70
1999-2003	positive	24
1999-2003	positive	56
1999-2003	positive	44
1999-2003	positive	36
1999-2003	positive	44
1999-2003	positive	45
1999-2003	negative	49
1999-2003	negative	51
1999-2003	negative	48
1999-2003	negative	21
1999-2003	negative	23
1999-2003	negative	28
1999-2003	negative	54
1999-2003	negative	51
1999-2003	negative	60
1999-2003	negative	30
1999-2003	negative	24
1999-2003	negative	60
1999-2003	negative	40
1999-2003	negative	20
1999-2003	negative	56
1999-2003	negative	55
1999-2003	negative	51
1999-2003	negative	32
1999-2003	negative	40
1999-2003	negative	44
1999-2003	negative	22
1999-2003	negative	48
1999-2003	negative	63
1999-2003	negative	43
1999-2003	negative	38
1999-2003	negative	72
1999-2003	negative	60
1999-2003	negative	36
1999-2003	negative	33
1999-2003	negative	41
1999-2003	negative	38
1999-2003	negative	31
1999-2003	negative	52
1999-2003	negative	31
1999-2003	negative	37
1999-2003	negative	54
1999-2003	negative	67
1999-2003	negative	22
1999-2003	negative	23
1999-2003	negative	33
1999-2003	negative	51
1999-2003	negative	21
1999-2003	positive	34
1999-2003	positive	39
1999-2003	positive	52
1999-2003	positive	42
1999-2003	positive	24
1999-2003	positive	50
1999-2003	positive	50
1999-2003	positive	29
1999-2003	positive	44
1999-2003	positive	38
1999-2003	positive	52
1999-2003	positive	70
1999-2003	positive	66
1999-2003	positive	42
1999-2003	positive	30
1999-2003	positive	61
1999-2003	positive	47
1999-2003	positive	67
1999-2003	positive	41
1999-2003	positive	43
1999-2003	positive	57
1999-2003	positive	40
1999-2003	positive	49
1999-2003	positive	35
1999-2003	positive	48
1999-2003	positive	24
1999-2003	positive	53
1999-2003	positive	54
1999-2003	positive	49
1999-2003	positive	43
1999-2003	positive	37
1999-2003	positive	42
1999-2003	positive	43
1999-2003	positive	52
1999-2003	positive	47
1999-2003	positive	45
1999-2003	positive	42
1999-2003	positive	64
1999-2003	positive	38
1999-2003	positive	64
1999-2003	positive	59
1999-2003	positive	38
1999-2003	positive	48
1999-2003	positive	50
1999-2003	positive	67
1999-2003	positive	31
1999-2003	positive	52
1999-2003	positive	52
1999-2003	positive	49
1999-2003	positive	68
1999-2003	positive	51
1999-2003	positive	59
1999-2003	negative	49
1999-2003	negative	45
1999-2003	negative	47
1999-2003	negative	35
1999-2003	negative	66
1999-2003	negative	32
1999-2003	negative	23
1999-2003	negative	40
1999-2003	negative	21
1999-2003	negative	68
1999-2003	negative	58
1999-2003	negative	75
1999-2003	negative	55
1999-2003	negative	79
1999-2003	negative	48
1999-2003	negative	33
1999-2003	negative	25
1999-2003	negative	75
1999-2003	negative	40
1999-2003	negative	34
1999-2003	negative	20
1999-2003	negative	19
1999-2003	negative	41
1999-2003	negative	45
1999-2003	negative	60
1999-2003	negative	52
1999-2003	negative	32
1999-2003	negative	66
1999-2003	negative	65
1999-2003	negative	33
1999-2003	negative	19
1999-2003	negative	43
1999-2003	negative	48
1999-2003	negative	29
1999-2003	negative	45
1999-2003	negative	57
1999-2003	negative	66
1999-2003	negative	43
1999-2003	negative	49
1999-2003	negative	29
1999-2003	negative	41
1999-2003	negative	31
1999-2003	negative	63
1999-2003	negative	28
1999-2003	negative	31
1999-2003	negative	47
1999-2003	negative	38
1999-2003	negative	28
1999-2003	negative	35
1999-2003	negative	25
1999-2003	negative	27
1999-2003	negative	45
1999-2003	negative	37
1999-2003	negative	39
1999-2003	negative	22
1999-2003	negative	19
1999-2003	negative	41
1999-2003	negative	24
1999-2003	negative	21
1999-2003	negative	23
1999-2003	negative	23
1999-2003	negative	38
1999-2003	negative	44
1999-2003	negative	53
1999-2003	positive	42
1999-2003	positive	47
1999-2003	positive	46
1999-2003	positive	61
1999-2003	positive	64
1999-2003	positive	54
1999-2003	positive	53
1999-2003	positive	47
1999-2003	positive	51
1999-2003	positive	44
1999-2003	positive	46
1999-2003	positive	46
1999-2003	positive	43
1999-2003	positive	31
1999-2003	positive	26
1999-2003	positive	19
1999-2003	positive	34
1999-2003	positive	23
1999-2003	positive	81
1999-2003	positive	29
1999-2003	positive	47
1999-2003	positive	72
1999-2003	positive	39
1999-2003	positive	52
1999-2003	positive	46
1999-2003	positive	52
1999-2003	positive	57
1999-2003	positive	50
1999-2003	positive	45
1999-2003	positive	50
1999-2003	positive	25
1999-2003	positive	38
1999-2003	positive	46
1999-2003	positive	56
1999-2003	positive	28
1999-2003	positive	50
1999-2003	positive	50
1999-2003	positive	43
1999-2003	positive	47
1999-2003	positive	72
1999-2003	positive	72
1999-2003	positive	69
1999-2003	positive	38
1999-2003	positive	42
1999-2003	positive	66
1999-2003	positive	35
1999-2003	positive	76
1999-2003	positive	48
1999-2003	positive	41
1999-2003	positive	28
1999-2003	positive	47
1999-2003	positive	65
1999-2003	positive	43
1999-2003	positive	36
1999-2003	positive	49
1999-2003	positive	72
1999-2003	positive	70
1999-2003	positive	31
1999-2003	positive	46
1999-2003	positive	33
1999-2003	positive	52
1999-2003	positive	77
1999-2003	positive	19
1999-2003	positive	57
1999-2003	positive	66
1999-2003	positive	46
1999-2003	positive	47
1999-2003	positive	48
1999-2003	positive	34
1999-2003	positive	67
1999-2003	positive	65
1999-2003	negative	43
1999-2003	negative	33
1999-2003	negative	73
1999-2003	negative	25
1999-2003	negative	40
1999-2003	negative	22
1999-2003	negative	40
1999-2003	negative	32
1999-2003	negative	66
1999-2003	negative	19
1999-2003	negative	55
1999-2003	negative	47
1999-2003	negative	29
1999-2003	negative	43
1999-2003	negative	18
1999-2003	negative	36
1999-2003	negative	49
1999-2003	negative	55
1999-2003	negative	22
1999-2003	negative	27
1999-2003	negative	56
1999-2003	negative	27
1999-2003	negative	50
1999-2003	negative	20
1999-2003	negative	51
1999-2003	negative	52
1999-2003	negative	50
1999-2003	negative	44
1999-2003	negative	34
1999-2003	negative	78
1999-2003	negative	53
1999-2003	negative	74
1999-2003	negative	23
1999-2003	negative	44
1999-2003	negative	26
1999-2003	negative	46
1999-2003	negative	32
1999-2003	negative	52
1999-2003	negative	66
1999-2003	negative	25
1999-2003	negative	23
1999-2003	negative	51
1999-2003	negative	18
1999-2003	negative	34
1999-2003	negative	41
1999-2003	negative	34
1999-2003	negative	32
1999-2003	negative	49
1999-2003	negative	50
1999-2003	negative	65
1999-2003	negative	36
1999-2003	negative	24
1999-2003	negative	51
1999-2003	negative	78
1999-2003	negative	38
1999-2003	negative	37
1999-2003	negative	68
1999-2003	negative	46
1999-2003	negative	34
1999-2003	negative	21
1999-2003	negative	61
1999-2003	positive	62
1999-2003	positive	62
1999-2003	positive	60
1999-2003	positive	63
1999-2003	positive	55
1999-2003	positive	26
1999-2003	positive	30
1999-2003	positive	29
1999-2003	positive	20
1999-2003	positive	47
1999-2003	positive	28
1999-2003	positive	66
1999-2003	positive	65
1999-2003	positive	63
1999-2003	positive	68
1999-2003	positive	53
1999-2003	positive	57
1999-2003	positive	47
1999-2003	positive	53
1999-2003	positive	43
1999-2003	positive	36
1999-2003	positive	67
1999-2003	positive	63
1999-2003	positive	60
1999-2003	positive	55
1999-2003	positive	30
1999-2003	positive	33
1999-2003	positive	53
1999-2003	positive	45
1999-2003	positive	33
1999-2003	positive	56
1999-2003	positive	72
1999-2003	positive	47
1999-2003	positive	24
1999-2003	positive	46
1999-2003	positive	59
1999-2003	positive	79
1999-2003	positive	52
1999-2003	positive	59
1999-2003	positive	39
1999-2003	positive	53
1999-2003	positive	68
1999-2003	positive	59
1999-2003	positive	36
1999-2003	positive	56
1999-2003	positive	48
1999-2003	positive	52
1999-2003	positive	60
1999-2003	positive	64
1999-2003	positive	59
1999-2003	positive	56
1999-2003	positive	61
1999-2003	positive	57
2011-2015	negative	76
2011-2015	negative	51
2011-2015	negative	33
2011-2015	negative	59
2011-2015	negative	63
2011-2015	negative	25
2011-2015	negative	61
2011-2015	negative	52
2011-2015	negative	62
2011-2015	negative	52
2011-2015	negative	46
2011-2015	negative	52
2011-2015	negative	69
2011-2015	negative	59
2011-2015	negative	66
2011-2015	negative	32
2011-2015	negative	71
2011-2015	negative	58
2011-2015	negative	66
2011-2015	negative	55
2011-2015	negative	53
2011-2015	negative	40
2011-2015	negative	47
2011-2015	negative	41
2011-2015	negative	36
2011-2015	negative	69
2011-2015	negative	40
2011-2015	negative	34
2011-2015	negative	71
2011-2015	negative	51
2011-2015	negative	61
2011-2015	negative	23
2011-2015	negative	47
2011-2015	negative	48
2011-2015	negative	31
2011-2015	negative	48
2011-2015	negative	41
2011-2015	negative	30
2011-2015	negative	35
2011-2015	negative	33
2011-2015	negative	54
2011-2015	negative	25
2011-2015	negative	35
2011-2015	negative	62
2011-2015	negative	59
2011-2015	negative	42
2011-2015	negative	55
2011-2015	negative	32
2011-2015	negative	60
2011-2015	negative	69
2011-2015	negative	65
2011-2015	negative	48
2011-2015	negative	32
2011-2015	negative	41
2011-2015	negative	37
2011-2015	negative	31
2011-2015	negative	34
2011-2015	negative	31
2011-2015	negative	39
2011-2015	negative	47
2011-2015	negative	28
2011-2015	negative	61
2011-2015	negative	60
2011-2015	negative	63
2011-2015	negative	67
2011-2015	negative	51
2011-2015	negative	20
2011-2015	negative	32
2011-2015	negative	25
2011-2015	negative	26
2011-2015	negative	50
2011-2015	negative	76
2011-2015	positive	74
2011-2015	positive	50
2011-2015	positive	54
2011-2015	positive	55
2011-2015	positive	65
2011-2015	positive	33
2011-2015	positive	35
2011-2015	positive	50
2011-2015	positive	52
2011-2015	positive	52
2011-2015	positive	60
2011-2015	positive	71
2011-2015	positive	39
2011-2015	positive	57
2011-2015	positive	57
2011-2015	positive	48
2011-2015	positive	59
2011-2015	positive	39
2011-2015	positive	52
2011-2015	positive	42
2011-2015	positive	39
2011-2015	positive	58
2011-2015	positive	51
2011-2015	positive	53
2011-2015	positive	27
2011-2015	positive	41
2011-2015	positive	45
2011-2015	positive	58
2011-2015	positive	18
2011-2015	positive	25
2011-2015	positive	53
2011-2015	positive	36
2011-2015	positive	25
2011-2015	positive	34
2011-2015	positive	60
2011-2015	positive	52
2011-2015	positive	41
2011-2015	positive	52
2011-2015	positive	46
2011-2015	positive	39
2011-2015	positive	51
2011-2015	positive	61
2011-2015	positive	55
2011-2015	positive	34
2011-2015	positive	65
2011-2015	positive	61
2011-2015	positive	35
2011-2015	positive	32
2011-2015	positive	50
2011-2015	positive	60
2011-2015	positive	29
2011-2015	positive	47
2011-2015	positive	50
2011-2015	positive	74
2011-2015	positive	21
2011-2015	positive	45
2011-2015	negative	71
2011-2015	negative	61
2011-2015	negative	59
2011-2015	negative	44
2011-2015	negative	34
2011-2015	negative	72
2011-2015	negative	64
2011-2015	negative	51
2011-2015	negative	24
2011-2015	negative	61
2011-2015	negative	59
2011-2015	negative	41
2011-2015	negative	42
2011-2015	negative	44
2011-2015	negative	54
2011-2015	negative	37
2011-2015	negative	30
2011-2015	negative	31
2011-2015	negative	67
2011-2015	negative	38
2011-2015	negative	37
2011-2015	negative	45
2011-2015	negative	48
2011-2015	negative	74
2011-2015	negative	55
2011-2015	negative	38
2011-2015	negative	60
2011-2015	negative	45
2011-2015	negative	30
2011-2015	negative	74
2011-2015	negative	41
2011-2015	negative	64
2011-2015	negative	65
2011-2015	negative	54
2011-2015	negative	23
2011-2015	negative	33
2011-2015	negative	58
2011-2015	negative	43
2011-2015	negative	63
2011-2015	negative	45
2011-2015	negative	37
2011-2015	positive	67
2011-2015	positive	54
2011-2015	positive	42
2011-2015	positive	68
2011-2015	positive	30
2011-2015	positive	62
2011-2015	positive	71
2011-2015	positive	68
2011-2015	positive	56
2011-2015	positive	68
2011-2015	positive	43
2011-2015	positive	78
2011-2015	positive	50
2011-2015	positive	63
2011-2015	positive	72
2011-2015	positive	53
2011-2015	positive	56
2011-2015	positive	30
2011-2015	positive	31
2011-2015	positive	46
2011-2015	positive	39
2011-2015	positive	33
2011-2015	positive	49
2011-2015	positive	48
2011-2015	positive	34
2011-2015	positive	78
2011-2015	positive	58
2011-2015	negative	55
2011-2015	negative	25
2011-2015	negative	56
2011-2015	negative	35
2011-2015	negative	60
2011-2015	negative	36
2011-2015	negative	44
2011-2015	negative	72
2011-2015	negative	49
2011-2015	negative	48
2011-2015	negative	29
2011-2015	negative	45
2011-2015	negative	44
2011-2015	negative	56
2011-2015	negative	62
2011-2015	negative	31
2011-2015	negative	61
2011-2015	negative	47
2011-2015	negative	51
2011-2015	negative	49
2011-2015	negative	44
2011-2015	negative	48
2011-2015	negative	26
2011-2015	negative	47
2011-2015	negative	31
2011-2015	negative	54
2011-2015	negative	61
2011-2015	negative	25
2011-2015	negative	82
2011-2015	negative	36
2011-2015	negative	51
2011-2015	negative	33
2011-2015	negative	30
2011-2015	negative	42
2011-2015	negative	72
2011-2015	negative	35
2011-2015	negative	65
2011-2015	negative	69
2011-2015	negative	57
2011-2015	negative	31
2011-2015	negative	30
2011-2015	negative	40
2011-2015	negative	30
2011-2015	negative	54
2011-2015	negative	25
2011-2015	negative	45
2011-2015	negative	46
2011-2015	negative	67
2011-2015	negative	70
2011-2015	negative	57
2011-2015	negative	36
2011-2015	negative	28
2011-2015	negative	52
2011-2015	negative	64
2011-2015	negative	39
2011-2015	negative	63
2011-2015	negative	28
2011-2015	negative	50
2011-2015	negative	61
2011-2015	negative	43
2011-2015	negative	77
2011-2015	negative	37
2011-2015	negative	34
2011-2015	negative	74
2011-2015	negative	24
2011-2015	negative	43
2011-2015	negative	61
2011-2015	positive	33
2011-2015	positive	54
2011-2015	positive	61
2011-2015	positive	74
2011-2015	positive	80
2011-2015	positive	37
2011-2015	positive	35
2011-2015	positive	51
2011-2015	positive	41
2011-2015	positive	66
2011-2015	positive	74
2011-2015	positive	46
2011-2015	positive	33
2011-2015	positive	49
2011-2015	positive	55
2011-2015	positive	53
2011-2015	positive	52
2011-2015	positive	72
2011-2015	positive	42
2011-2015	positive	39
2011-2015	positive	55
2011-2015	positive	64
2011-2015	positive	56
2011-2015	positive	63
2011-2015	positive	24
2011-2015	positive	39
2011-2015	positive	55
2011-2015	positive	44
2011-2015	positive	47
2011-2015	positive	50
2011-2015	positive	32
2011-2015	positive	43
2011-2015	positive	71
2011-2015	positive	30
2011-2015	positive	53
2011-2015	positive	57
2011-2015	positive	24
2011-2015	positive	57
2011-2015	positive	29
2011-2015	positive	45
2011-2015	positive	42
2011-2015	positive	30
2011-2015	positive	46
2011-2015	positive	74
2011-2015	positive	36
2011-2015	positive	35
2011-2015	positive	40
2011-2015	positive	53
2011-2015	positive	70
2011-2015	negative	68
2011-2015	negative	49
2011-2015	negative	37
2011-2015	negative	55
2011-2015	negative	76
2011-2015	negative	36
2011-2015	negative	76
2011-2015	negative	56
2011-2015	negative	64
2011-2015	negative	29
2011-2015	negative	56
2011-2015	negative	50
2011-2015	negative	73
2011-2015	negative	53
2011-2015	negative	76
2011-2015	negative	46
2011-2015	negative	65
2011-2015	negative	58
2011-2015	negative	76
2011-2015	negative	50
2011-2015	negative	60
2011-2015	negative	28
2011-2015	negative	61
2011-2015	negative	46
2011-2015	negative	34
2011-2015	negative	26
2011-2015	negative	42
2011-2015	negative	45
2011-2015	negative	49
2011-2015	negative	27
2011-2015	negative	73
2011-2015	negative	40
2011-2015	negative	42
2011-2015	negative	62
2011-2015	negative	36
2011-2015	negative	36
2011-2015	negative	63
2011-2015	negative	62
2011-2015	negative	34
2011-2015	negative	48
2011-2015	negative	85
2011-2015	negative	71
2011-2015	negative	55
2011-2015	negative	32
2011-2015	negative	63
2011-2015	negative	39
2011-2015	negative	62
2011-2015	negative	75
2011-2015	negative	56
2011-2015	negative	80
2011-2015	negative	75
2011-2015	negative	60
2011-2015	positive	32
2011-2015	positive	24
2011-2015	positive	27
2011-2015	positive	55
2011-2015	positive	53
2011-2015	positive	49
2011-2015	positive	34
2011-2015	positive	50
2011-2015	positive	54
2011-2015	positive	70
2011-2015	positive	24
2011-2015	positive	54
2011-2015	positive	44
2011-2015	positive	27
2011-2015	positive	47
2011-2015	positive	49
2011-2015	positive	44
2011-2015	positive	45
2011-2015	positive	37
2011-2015	positive	53
2011-2015	positive	59
2011-2015	positive	30
2011-2015	positive	66
2011-2015	positive	31
2011-2015	negative	53
2011-2015	negative	24
2011-2015	negative	41
2011-2015	negative	28
2011-2015	negative	62
2011-2015	negative	68
2011-2015	negative	57
2011-2015	negative	26
2011-2015	positive	40
2011-2015	negative	23
2011-2015	negative	76
2011-2015	positive	53
2011-2015	negative	26
2011-2015	negative	69
2011-2015	negative	21
2011-2015	negative	21
2011-2015	negative	60
2011-2015	negative	37
2011-2015	negative	65
2011-2015	positive	61
2011-2015	negative	25
2011-2015	negative	67
2011-2015	negative	55
2011-2015	negative	49
2011-2015	negative	25
2011-2015	negative	39
2011-2015	positive	77
2011-2015	negative	31

## Sheet: Figure 1
ART_year_group	Helicobacter_pilori	HIV
1993-1997	negative	HIV positive
1993-1997	negative	HIV positive
1993-1997	negative	HIV positive
1993-1997	negative	HIV positive
1993-1997	negative	HIV positive
1993-1997	negative	HIV positive
1993-1997	negative	HIV positive
1993-1997	negative	HIV positive
1999-2003	negative	HIV positive
1999-2003	negative	HIV positive
1999-2003	negative	HIV positive
1999-2003	negative	HIV positive
1993-1997	negative	HIV positive
1993-1997	negative	HIV positive
1993-1997	negative	HIV positive
1993-1997	negative	HIV positive
1993-1997	negative	HIV positive
1993-1997	negative	HIV positive
1993-1997	negative	HIV positive
1993-1997	negative	HIV positive
1993-1997	negative	HIV positive
1993-1997	negative	HIV positive
1993-1997	negative	HIV positive
1999-2003	negative	HIV positive
1999-2003	negative	HIV positive
1999-2003	negative	HIV positive
1999-2003	negative	HIV positive
1999-2003	negative	HIV positive
1999-2003	negative	HIV positive
1999-2003	negative	HIV positive
1999-2003	negative	HIV positive
1999-2003	negative	HIV positive
1999-2003	negative	HIV positive
1999-2003	negative	HIV positive
1999-2003	negative	HIV positive
1999-2003	negative	HIV positive
1999-2003	negative	HIV positive
1999-2003	negative	HIV positive
1999-2003	negative	HIV positive
1999-2003	negative	HIV positive
1999-2003	negative	HIV positive
2011-2015	negative	HIV positive
2011-2015	negative	HIV positive
2011-2015	negative	HIV positive
2011-2015	negative	HIV positive
2011-2015	negative	HIV positive
2011-2015	negative	HIV positive
2011-2015	negative	HIV positive
2011-2015	negative	HIV positive
2011-2015	negative	HIV positive
2011-2015	negative	HIV positive
2011-2015	negative	HIV positive
2011-2015	negative	HIV positive
2011-2015	negative	HIV positive
2011-2015	negative	HIV positive
2011-2015	negative	HIV positive
2011-2015	negative	HIV positive
2011-2015	negative	HIV positive
2011-2015	negative	HIV positive
2011-2015	negative	HIV positive
2011-2015	negative	HIV positive
2011-2015	negative	HIV positive
2011-2015	negative	HIV positive
2011-2015	negative	HIV positive
2011-2015	negative	HIV positive
2011-2015	negative	HIV positive
2011-2015	negative	HIV positive
2011-2015	negative	HIV positive
2011-2015	negative	HIV positive
2011-2015	negative	HIV positive
2011-2015	negative	HIV positive
2011-2015	negative	HIV positive
2011-2015	negative	HIV positive
2011-2015	negative	HIV positive
2011-2015	negative	HIV positive
2011-2015	negative	HIV positive
2011-2015	negative	HIV positive
2011-2015	negative	HIV positive
2011-2015	negative	HIV positive
2011-2015	negative	HIV positive
2011-2015	negative	HIV positive
2011-2015	negative	HIV positive
2011-2015	negative	HIV positive
2011-2015	negative	HIV positive
1993-1997	negative	HIV positive
1993-1997	negative	HIV positive
1993-1997	negative	HIV positive
1993-1997	negative	HIV positive
1993-1997	negative	HIV positive
1993-1997	negative	HIV positive
1993-1997	negative	HIV positive
1993-1997	negative	HIV positive
1993-1997	negative	HIV positive
1993-1997	negative	HIV positive
1993-1997	negative	HIV positive
1993-1997	negative	HIV positive
1993-1997	negative	HIV positive
1993-1997	negative	HIV positive
1993-1997	negative	HIV positive
1993-1997	negative	HIV positive
1993-1997	negative	HIV positive
1993-1997	negative	HIV positive
1993-1997	negative	HIV positive
1993-1997	negative	HIV positive
1993-1997	negative	HIV positive
1993-1997	negative	HIV positive
1993-1997	negative	HIV positive
1993-1997	negative	HIV positive
1993-1997	negative	HIV positive
1993-1997	negative	HIV positive
1993-1997	negative	HIV positive
1993-1997	negative	HIV positive
1993-1997	negative	HIV positive
1993-1997	negative	HIV positive
1993-1997	negative	HIV positive
1993-1997	negative	HIV positive
1993-1997	negative	HIV positive
1993-1997	negative	HIV positive
1993-1997	negative	HIV positive
1999-2003	negative	HIV positive
1999-2003	negative	HIV positive
1999-2003	negative	HIV positive
1999-2003	negative	HIV positive
1999-2003	negative	HIV positive
1999-2003	negative	HIV positive
1999-2003	negative	HIV positive
1999-2003	negative	HIV positive
1999-2003	negative	HIV positive
1999-2003	negative	HIV positive
1999-2003	negative	HIV positive
1999-2003	negative	HIV positive
1999-2003	negative	HIV positive
1999-2003	negative	HIV positive
2011-2015	negative	HIV positive
2011-2015	negative	HIV positive
2011-2015	negative	HIV positive
2011-2015	negative	HIV positive
2011-2015	negative	HIV positive
2011-2015	negative	HIV positive
2011-2015	negative	HIV positive
2011-2015	negative	HIV positive
2011-2015	negative	HIV positive
2011-2015	negative	HIV positive
2011-2015	negative	HIV positive
2011-2015	negative	HIV positive
2011-2015	negative	HIV positive
2011-2015	negative	HIV positive
2011-2015	negative	HIV positive
2011-2015	negative	HIV positive
2011-2015	negative	HIV positive
2011-2015	negative	HIV positive
1993-1997	positive	HIV positive
1999-2003	positive	HIV positive
1993-1997	positive	HIV positive
1993-1997	positive	HIV positive
1993-1997	positive	HIV positive
1993-1997	positive	HIV positive
1999-2003	positive	HIV positive
1999-2003	positive	HIV positive
1999-2003	positive	HIV positive
1999-2003	positive	HIV positive
1999-2003	positive	HIV positive
1999-2003	positive	HIV positive
1999-2003	positive	HIV positive
1999-2003	positive	HIV positive
1999-2003	positive	HIV positive
1999-2003	positive	HIV positive
2011-2015	positive	HIV positive
2011-2015	positive	HIV positive
2011-2015	positive	HIV positive
2011-2015	positive	HIV positive
2011-2015	positive	HIV positive
2011-2015	positive	HIV positive
2011-2015	positive	HIV positive
2011-2015	positive	HIV positive
2011-2015	positive	HIV positive
2011-2015	positive	HIV positive
2011-2015	positive	HIV positive
2011-2015	positive	HIV positive
2011-2015	positive	HIV positive
2011-2015	positive	HIV positive
1993-1997	positive	HIV positive
1993-1997	positive	HIV positive
1993-1997	positive	HIV positive
1993-1997	positive	HIV positive
1993-1997	positive	HIV positive
1993-1997	positive	HIV positive
1993-1997	positive	HIV positive
1999-2003	positive	HIV positive
1999-2003	positive	HIV positive
1999-2003	negative	HIV positive
1999-2003	positive	HIV positive
1999-2003	positive	HIV positive
1999-2003	positive	HIV positive
2011-2015	positive	HIV positive
2011-2015	positive	HIV positive
2011-2015	positive	HIV positive
2011-2015	positive	HIV positive
2011-2015	positive	HIV positive
2011-2015	positive	HIV positive
2011-2015	positive	HIV positive
2011-2015	positive	HIV positive
2011-2015	positive	HIV positive
2011-2015	positive	HIV positive
2011-2015	positive	HIV positive
2011-2015	positive	HIV positive
2011-2015	positive	HIV positive
2011-2015	positive	HIV positive
2011-2015	positive	HIV positive
2011-2015	positive	HIV positive
2011-2015	positive	HIV positive
2011-2015	positive	HIV positive

## Sheet: Figure 2
Helicobacter_pilori	ART_year_group	HIV
No	1993-1997	negative
No	1993-1997	negative
No	1993-1997	negative
No	1993-1997	negative
No	1993-1997	negative
No	1993-1997	negative
No	1993-1997	negative
No	1993-1997	negative
No	1993-1997	negative
No	1993-1997	negative
No	1993-1997	negative
No	1993-1997	negative
No	1993-1997	negative
No	1993-1997	negative
No	1993-1997	negative
No	1993-1997	negative
No	1993-1997	negative
No	1993-1997	negative
No	1993-1997	negative
No	1993-1997	negative
No	1993-1997	negative
No	1993-1997	negative
No	1993-1997	negative
No	1993-1997	negative
No	1993-1997	negative
No	1993-1997	negative
No	1993-1997	negative
No	1993-1997	negative
No	1993-1997	negative
No	1993-1997	negative
No	1993-1997	negative
No	1993-1997	negative
No	1993-1997	negative
No	1993-1997	negative
No	1993-1997	negative
No	1993-1997	negative
No	1993-1997	negative
No	1993-1997	negative
Yes	1993-1997	negative
Yes	1993-1997	negative
Yes	1993-1997	negative
Yes	1993-1997	negative
Yes	1993-1997	negative
Yes	1993-1997	negative
Yes	1993-1997	negative
Yes	1993-1997	negative
Yes	1993-1997	negative
Yes	1993-1997	negative
Yes	1993-1997	negative
Yes	1993-1997	negative
Yes	1993-1997	negative
Yes	1993-1997	negative
Yes	1993-1997	negative
Yes	1993-1997	negative
Yes	1993-1997	negative
Yes	1993-1997	negative
Yes	1993-1997	negative
Yes	1993-1997	negative
Yes	1993-1997	negative
Yes	1993-1997	negative
Yes	1993-1997	negative
Yes	1993-1997	negative
Yes	1993-1997	negative
Yes	1993-1997	negative
Yes	1993-1997	negative
Yes	1993-1997	negative
Yes	1993-1997	negative
Yes	1993-1997	negative
Yes	1993-1997	negative
Yes	1993-1997	negative
Yes	1993-1997	negative
Yes	1993-1997	negative
Yes	1993-1997	negative
Yes	1993-1997	negative
Yes	1993-1997	negative
Yes	1993-1997	negative
Yes	1993-1997	negative
Yes	1993-1997	negative
Yes	1993-1997	negative
Yes	1993-1997	negative
Yes	1993-1997	negative
Yes	1993-1997	negative
Yes	1993-1997	negative
Yes	1993-1997	negative
Yes	1993-1997	negative
Yes	1993-1997	negative
Yes	1993-1997	negative
Yes	1993-1997	negative
Yes	1993-1997	negative
Yes	1993-1997	negative
Yes	1993-1997	negative
Yes	1993-1997	negative
Yes	1993-1997	negative
Yes	1993-1997	negative
Yes	1993-1997	negative
Yes	1993-1997	negative
Yes	1993-1997	negative
Yes	1993-1997	negative
Yes	1993-1997	negative
Yes	1993-1997	negative
Yes	1993-1997	negative
Yes	1993-1997	negative
Yes	1993-1997	negative
Yes	1993-1997	negative
Yes	1993-1997	negative
Yes	1993-1997	negative
Yes	1993-1997	negative
Yes	1993-1997	negative
Yes	1993-1997	negative
Yes	1993-1997	negative
Yes	1993-1997	negative
Yes	1993-1997	negative
Yes	1993-1997	negative
No	1993-1997	negative
No	1993-1997	negative
No	1993-1997	negative
No	1993-1997	negative
No	1993-1997	negative
No	1993-1997	negative
No	1993-1997	negative
No	1993-1997	negative
No	1993-1997	negative
No	1993-1997	negative
No	1993-1997	negative
No	1993-1997	negative
No	1993-1997	negative
No	1993-1997	negative
No	1993-1997	negative
No	1993-1997	negative
No	1993-1997	negative
No	1993-1997	negative
No	1993-1997	negative
No	1993-1997	negative
No	1993-1997	negative
No	1993-1997	negative
No	1993-1997	negative
No	1993-1997	negative
No	1993-1997	negative
No	1993-1997	negative
No	1993-1997	negative
No	1993-1997	negative
No	1993-1997	negative
No	1993-1997	negative
No	1993-1997	negative
No	1993-1997	negative
No	1993-1997	negative
No	1993-1997	negative
No	1993-1997	negative
No	1993-1997	negative
No	1993-1997	negative
No	1993-1997	negative
No	1993-1997	negative
No	1993-1997	negative
No	1993-1997	negative
No	1993-1997	negative
No	1993-1997	negative
No	1993-1997	negative
Yes	1993-1997	negative
Yes	1993-1997	negative
Yes	1993-1997	negative
Yes	1993-1997	negative
Yes	1993-1997	negative
Yes	1993-1997	negative
Yes	1993-1997	negative
Yes	1993-1997	negative
Yes	1993-1997	negative
Yes	1993-1997	negative
Yes	1993-1997	negative
Yes	1993-1997	negative
Yes	1993-1997	negative
Yes	1993-1997	negative
Yes	1993-1997	negative
Yes	1993-1997	negative
Yes	1993-1997	negative
Yes	1993-1997	negative
Yes	1993-1997	negative
Yes	1993-1997	negative
Yes	1993-1997	negative
Yes	1993-1997	negative
Yes	1993-1997	negative
Yes	1993-1997	negative
Yes	1993-1997	negative
Yes	1993-1997	negative
Yes	1993-1997	negative
Yes	1993-1997	negative
Yes	1993-1997	negative
Yes	1993-1997	negative
Yes	1993-1997	negative
Yes	1993-1997	negative
Yes	1993-1997	negative
Yes	1993-1997	negative
Yes	1993-1997	negative
Yes	1993-1997	negative
Yes	1993-1997	negative
Yes	1993-1997	negative
Yes	1993-1997	negative
Yes	1993-1997	negative
Yes	1993-1997	negative
Yes	1993-1997	negative
Yes	1993-1997	negative
Yes	1993-1997	negative
Yes	1993-1997	negative
Yes	1993-1997	negative
Yes	1993-1997	negative
Yes	1993-1997	negative
Yes	1993-1997	negative
Yes	1993-1997	negative
Yes	1993-1997	negative
Yes	1993-1997	negative
Yes	1993-1997	negative
Yes	1993-1997	negative
Yes	1993-1997	negative
Yes	1993-1997	negative
Yes	1993-1997	negative
Yes	1993-1997	negative
Yes	1993-1997	negative
Yes	1993-1997	negative
Yes	1993-1997	negative
Yes	1993-1997	negative
Yes	1993-1997	negative
Yes	1993-1997	negative
Yes	1993-1997	negative
Yes	1993-1997	negative
Yes	1993-1997	negative
Yes	1993-1997	negative
Yes	1993-1997	negative
Yes	1993-1997	negative
Yes	1993-1997	negative
Yes	1993-1997	negative
Yes	1993-1997	negative
Yes	1993-1997	negative
Yes	1993-1997	negative
Yes	1993-1997	negative
Yes	1993-1997	negative
Yes	1993-1997	negative
Yes	1993-1997	negative
Yes	1993-1997	negative
Yes	1993-1997	negative
Yes	1993-1997	negative
Yes	1993-1997	negative
Yes	1993-1997	negative
Yes	1993-1997	negative
Yes	1993-1997	negative
Yes	1993-1997	negative
No	1993-1997	negative
No	1993-1997	negative
No	1993-1997	negative
No	1993-1997	negative
No	1993-1997	negative
No	1993-1997	negative
No	1993-1997	negative
No	1993-1997	negative
No	1993-1997	negative
No	1993-1997	negative
No	1993-1997	negative
No	1993-1997	negative
No	1993-1997	negative
No	1993-1997	negative
No	1993-1997	negative
No	1993-1997	negative
No	1993-1997	negative
No	1993-1997	negative
No	1993-1997	negative
No	1993-1997	negative
No	1993-1997	negative
No	1993-1997	negative
No	1993-1997	negative
No	1993-1997	negative
No	1993-1997	negative
No	1993-1997	negative
No	1993-1997	negative
No	1993-1997	negative
No	1993-1997	negative
No	1993-1997	negative
No	1993-1997	negative
No	1993-1997	negative
No	1993-1997	negative
No	1993-1997	negative
No	1993-1997	negative
No	1993-1997	negative
No	1993-1997	negative
No	1993-1997	negative
No	1993-1997	negative
No	1993-1997	negative
No	1993-1997	negative
No	1993-1997	negative
Yes	1993-1997	negative
Yes	1993-1997	negative
Yes	1993-1997	negative
Yes	1993-1997	negative
Yes	1993-1997	negative
Yes	1993-1997	negative
Yes	1993-1997	negative
Yes	1993-1997	negative
Yes	1993-1997	negative
Yes	1993-1997	negative
Yes	1993-1997	negative
Yes	1993-1997	negative
Yes	1993-1997	negative
Yes	1993-1997	negative
Yes	1993-1997	negative
Yes	1993-1997	negative
Yes	1993-1997	negative
Yes	1993-1997	negative
Yes	1993-1997	negative
Yes	1993-1997	negative
Yes	1993-1997	negative
Yes	1993-1997	negative
Yes	1993-1997	negative
Yes	1993-1997	negative
Yes	1993-1997	negative
Yes	1993-1997	negative
Yes	1993-1997	negative
Yes	1993-1997	negative
Yes	1993-1997	negative
Yes	1993-1997	negative
Yes	1993-1997	negative
Yes	1993-1997	negative
Yes	1993-1997	negative
Yes	1993-1997	negative
Yes	1993-1997	negative
Yes	1993-1997	negative
Yes	1993-1997	negative
Yes	1993-1997	negative
Yes	1993-1997	negative
Yes	1993-1997	negative
Yes	1993-1997	negative
Yes	1993-1997	negative
Yes	1993-1997	negative
Yes	1993-1997	negative
Yes	1993-1997	negative
Yes	1993-1997	negative
Yes	1993-1997	negative
Yes	1993-1997	negative
Yes	1993-1997	negative
Yes	1993-1997	negative
Yes	1993-1997	negative
Yes	1993-1997	negative
Yes	1993-1997	negative
Yes	1993-1997	negative
Yes	1993-1997	negative
Yes	1993-1997	negative
Yes	1993-1997	negative
Yes	1993-1997	negative
Yes	1993-1997	negative
Yes	1993-1997	negative
Yes	1993-1997	negative
Yes	1993-1997	negative
Yes	1993-1997	negative
Yes	1993-1997	negative
Yes	1993-1997	negative
Yes	1993-1997	negative
Yes	1993-1997	negative
Yes	1993-1997	negative
Yes	1993-1997	negative
Yes	1993-1997	negative
Yes	1993-1997	negative
Yes	1993-1997	negative
Yes	1993-1997	negative
No	1993-1997	negative
No	1993-1997	negative
No	1993-1997	negative
No	1993-1997	negative
No	1993-1997	negative
No	1993-1997	negative
No	1993-1997	negative
No	1993-1997	negative
No	1993-1997	negative
No	1993-1997	negative
No	1993-1997	negative
No	1993-1997	negative
No	1993-1997	negative
No	1993-1997	negative
No	1993-1997	negative
No	1993-1997	negative
No	1993-1997	negative
No	1993-1997	negative
No	1993-1997	negative
No	1993-1997	negative
No	1993-1997	negative
No	1993-1997	negative
No	1993-1997	negative
No	1993-1997	negative
No	1993-1997	negative
No	1993-1997	negative
No	1993-1997	negative
No	1993-1997	negative
No	1993-1997	negative
No	1993-1997	negative
No	1993-1997	negative
No	1993-1997	negative
No	1993-1997	negative
No	1993-1997	negative
No	1993-1997	negative
No	1993-1997	negative
No	1993-1997	negative
No	1993-1997	negative
No	1993-1997	negative
No	1993-1997	negative
No	1993-1997	negative
No	1993-1997	negative
No	1993-1997	negative
No	1993-1997	negative
No	1993-1997	negative
No	1993-1997	negative
No	1993-1997	negative
No	1993-1997	negative
No	1993-1997	negative
No	1993-1997	negative
No	1993-1997	negative
No	1993-1997	negative
No	1993-1997	negative
No	1993-1997	negative
No	1993-1997	negative
No	1993-1997	negative
No	1993-1997	negative
No	1993-1997	negative
No	1993-1997	negative
No	1993-1997	negative
No	1993-1997	negative
No	1993-1997	negative
No	1993-1997	negative
No	1993-1997	negative
No	1993-1997	negative
No	1993-1997	negative
No	1993-1997	negative
No	1993-1997	negative
Yes	1993-1997	negative
Yes	1993-1997	negative
Yes	1993-1997	negative
Yes	1993-1997	negative
Yes	1993-1997	negative
Yes	1993-1997	negative
Yes	1993-1997	negative
Yes	1993-1997	negative
Yes	1993-1997	negative
Yes	1993-1997	negative
Yes	1993-1997	negative
Yes	1993-1997	negative
Yes	1993-1997	negative
Yes	1993-1997	negative
Yes	1993-1997	negative
Yes	1993-1997	negative
Yes	1993-1997	negative
Yes	1993-1997	negative
Yes	1993-1997	negative
Yes	1993-1997	negative
Yes	1993-1997	negative
Yes	1993-1997	negative
Yes	1993-1997	negative
Yes	1993-1997	negative
Yes	1993-1997	negative
Yes	1993-1997	negative
Yes	1993-1997	negative
Yes	1993-1997	negative
Yes	1993-1997	negative
Yes	1993-1997	negative
Yes	1993-1997	negative
Yes	1993-1997	negative
Yes	1993-1997	negative
Yes	1993-1997	negative
Yes	1993-1997	negative
Yes	1993-1997	negative
Yes	1993-1997	negative
Yes	1993-1997	negative
Yes	1993-1997	negative
Yes	1993-1997	negative
Yes	1993-1997	negative
Yes	1993-1997	negative
Yes	1993-1997	negative
Yes	1993-1997	negative
Yes	1993-1997	negative
Yes	1993-1997	negative
Yes	1993-1997	negative
Yes	1993-1997	negative
Yes	1993-1997	negative
Yes	1993-1997	negative
Yes	1993-1997	negative
Yes	1993-1997	negative
Yes	1993-1997	negative
Yes	1993-1997	negative
Yes	1993-1997	negative
Yes	1993-1997	negative
Yes	1993-1997	negative
Yes	1993-1997	negative
Yes	1993-1997	negative
Yes	1993-1997	negative
Yes	1993-1997	negative
Yes	1993-1997	negative
Yes	1993-1997	negative
Yes	1993-1997	negative
Yes	1993-1997	negative
Yes	1993-1997	negative
Yes	1993-1997	negative
Yes	1993-1997	negative
Yes	1993-1997	negative
Yes	1993-1997	negative
Yes	1993-1997	negative
Yes	1993-1997	negative
Yes	1993-1997	negative
Yes	1993-1997	negative
Yes	1993-1997	negative
Yes	1993-1997	negative
Yes	1993-1997	negative
Yes	1993-1997	negative
Yes	1993-1997	negative
Yes	1993-1997	negative
Yes	1993-1997	negative
Yes	1993-1997	negative
Yes	1993-1997	negative
Yes	1993-1997	negative
Yes	1993-1997	negative
No	1993-1997	negative
No	1993-1997	negative
No	1993-1997	negative
No	1993-1997	negative
No	1993-1997	negative
No	1993-1997	negative
No	1993-1997	negative
No	1993-1997	negative
No	1993-1997	negative
No	1993-1997	negative
No	1993-1997	negative
No	1993-1997	negative
No	1993-1997	negative
No	1993-1997	negative
No	1993-1997	negative
No	1993-1997	negative
No	1993-1997	negative
No	1993-1997	negative
No	1993-1997	negative
No	1993-1997	negative
No	1993-1997	negative
No	1993-1997	negative
No	1993-1997	negative
No	1993-1997	negative
No	1993-1997	negative
No	1993-1997	negative
No	1993-1997	negative
No	1993-1997	negative
No	1993-1997	negative
No	1993-1997	negative
No	1993-1997	negative
No	1993-1997	negative
No	1993-1997	negative
No	1993-1997	negative
No	1993-1997	negative
No	1993-1997	negative
No	1993-1997	negative
No	1993-1997	negative
No	1993-1997	negative
No	1993-1997	negative
No	1993-1997	negative
No	1993-1997	negative
No	1993-1997	negative
Yes	1993-1997	negative
Yes	1993-1997	negative
Yes	1993-1997	negative
Yes	1993-1997	negative
Yes	1993-1997	negative
Yes	1993-1997	negative
Yes	1993-1997	negative
Yes	1993-1997	negative
Yes	1993-1997	negative
Yes	1993-1997	negative
Yes	1993-1997	negative
Yes	1993-1997	negative
Yes	1993-1997	negative
Yes	1993-1997	negative
Yes	1993-1997	negative
Yes	1993-1997	negative
Yes	1993-1997	negative
Yes	1993-1997	negative
Yes	1993-1997	negative
Yes	1993-1997	negative
Yes	1993-1997	negative
Yes	1993-1997	negative
Yes	1993-1997	negative
Yes	1993-1997	negative
Yes	1993-1997	negative
Yes	1993-1997	negative
Yes	1993-1997	negative
Yes	1993-1997	negative
Yes	1993-1997	negative
Yes	1993-1997	negative
Yes	1993-1997	negative
Yes	1993-1997	negative
Yes	1993-1997	negative
Yes	1993-1997	negative
Yes	1993-1997	negative
Yes	1993-1997	negative
Yes	1993-1997	negative
Yes	1993-1997	negative
Yes	1993-1997	negative
Yes	1993-1997	negative
Yes	1993-1997	negative
Yes	1993-1997	negative
Yes	1993-1997	negative
No	1999-2003	negative
No	1999-2003	negative
No	1999-2003	negative
No	1999-2003	negative
No	1999-2003	negative
No	1999-2003	negative
No	1999-2003	negative
No	1999-2003	negative
No	1999-2003	negative
No	1999-2003	negative
No	1999-2003	negative
No	1999-2003	negative
No	1999-2003	negative
No	1999-2003	negative
No	1999-2003	negative
No	1999-2003	negative
No	1999-2003	negative
No	1999-2003	negative
No	1999-2003	negative
No	1999-2003	negative
No	1999-2003	negative
No	1999-2003	negative
No	1999-2003	negative
No	1999-2003	negative
No	1999-2003	negative
No	1999-2003	negative
No	1999-2003	negative
No	1999-2003	negative
No	1999-2003	negative
No	1999-2003	negative
No	1999-2003	negative
No	1999-2003	negative
No	1999-2003	negative
No	1999-2003	negative
No	1999-2003	negative
No	1999-2003	negative
No	1999-2003	negative
No	1999-2003	negative
No	1999-2003	negative
No	1999-2003	negative
No	1999-2003	negative
No	1999-2003	negative
No	1999-2003	negative
Yes	1999-2003	negative
Yes	1999-2003	negative
Yes	1999-2003	negative
Yes	1999-2003	negative
Yes	1999-2003	negative
Yes	1999-2003	negative
Yes	1999-2003	negative
Yes	1999-2003	negative
Yes	1999-2003	negative
Yes	1999-2003	negative
Yes	1999-2003	negative
Yes	1999-2003	negative
Yes	1999-2003	negative
Yes	1999-2003	negative
Yes	1999-2003	negative
Yes	1999-2003	negative
Yes	1999-2003	negative
Yes	1999-2003	negative
Yes	1999-2003	negative
Yes	1999-2003	negative
Yes	1999-2003	negative
Yes	1999-2003	negative
Yes	1999-2003	negative
Yes	1999-2003	negative
Yes	1999-2003	negative
Yes	1999-2003	negative
Yes	1999-2003	negative
Yes	1999-2003	negative
Yes	1999-2003	negative
Yes	1999-2003	negative
Yes	1999-2003	negative
Yes	1999-2003	negative
Yes	1999-2003	negative
Yes	1999-2003	negative
Yes	1999-2003	negative
Yes	1999-2003	negative
Yes	1999-2003	negative
Yes	1999-2003	negative
Yes	1999-2003	negative
Yes	1999-2003	negative
Yes	1999-2003	negative
Yes	1999-2003	negative
Yes	1999-2003	negative
Yes	1999-2003	negative
Yes	1999-2003	negative
Yes	1999-2003	negative
Yes	1999-2003	negative
Yes	1999-2003	negative
Yes	1999-2003	negative
Yes	1999-2003	negative
Yes	1999-2003	negative
Yes	1999-2003	negative
Yes	1999-2003	negative
Yes	1999-2003	negative
Yes	1999-2003	negative
Yes	1999-2003	negative
Yes	1999-2003	negative
Yes	1999-2003	negative
Yes	1999-2003	negative
Yes	1999-2003	negative
Yes	1999-2003	negative
Yes	1999-2003	negative
Yes	1999-2003	negative
Yes	1999-2003	negative
Yes	1999-2003	negative
Yes	1999-2003	negative
Yes	1999-2003	negative
Yes	1999-2003	negative
Yes	1999-2003	negative
Yes	1999-2003	negative
Yes	1999-2003	negative
Yes	1999-2003	negative
Yes	1999-2003	negative
Yes	1999-2003	negative
Yes	1999-2003	negative
Yes	1999-2003	negative
Yes	1999-2003	negative
Yes	1999-2003	negative
No	1999-2003	negative
No	1999-2003	negative
No	1999-2003	negative
No	1999-2003	negative
No	1999-2003	negative
No	1999-2003	negative
No	1999-2003	negative
No	1999-2003	negative
No	1999-2003	negative
No	1999-2003	negative
No	1999-2003	negative
No	1999-2003	negative
No	1999-2003	negative
No	1999-2003	negative
No	1999-2003	negative
No	1999-2003	negative
No	1999-2003	negative
No	1999-2003	negative
No	1999-2003	negative
No	1999-2003	negative
No	1999-2003	negative
No	1999-2003	negative
No	1999-2003	negative
No	1999-2003	negative
No	1999-2003	negative
No	1999-2003	negative
No	1999-2003	negative
No	1999-2003	negative
No	1999-2003	negative
No	1999-2003	negative
No	1999-2003	negative
No	1999-2003	negative
No	1999-2003	negative
No	1999-2003	negative
No	1999-2003	negative
No	1999-2003	negative
No	1999-2003	negative
No	1999-2003	negative
No	1999-2003	negative
No	1999-2003	negative
No	1999-2003	negative
No	1999-2003	negative
No	1999-2003	negative
No	1999-2003	negative
No	1999-2003	negative
No	1999-2003	negative
No	1999-2003	negative
No	1999-2003	negative
No	1999-2003	negative
No	1999-2003	negative
No	1999-2003	negative
No	1999-2003	negative
No	1999-2003	negative
No	1999-2003	negative
No	1999-2003	negative
No	1999-2003	negative
No	1999-2003	negative
No	1999-2003	negative
No	1999-2003	negative
No	1999-2003	negative
No	1999-2003	negative
No	1999-2003	negative
No	1999-2003	negative
No	1999-2003	negative
No	1999-2003	negative
No	1999-2003	negative
No	1999-2003	negative
No	1999-2003	negative
No	1999-2003	negative
No	1999-2003	negative
No	1999-2003	negative
No	1999-2003	negative
No	1999-2003	negative
No	1999-2003	negative
Yes	1999-2003	negative
Yes	1999-2003	negative
Yes	1999-2003	negative
Yes	1999-2003	negative
Yes	1999-2003	negative
Yes	1999-2003	negative
Yes	1999-2003	negative
Yes	1999-2003	negative
Yes	1999-2003	negative
Yes	1999-2003	negative
Yes	1999-2003	negative
Yes	1999-2003	negative
Yes	1999-2003	negative
Yes	1999-2003	negative
Yes	1999-2003	negative
Yes	1999-2003	negative
Yes	1999-2003	negative
Yes	1999-2003	negative
Yes	1999-2003	negative
Yes	1999-2003	negative
Yes	1999-2003	negative
Yes	1999-2003	negative
Yes	1999-2003	negative
Yes	1999-2003	negative
Yes	1999-2003	negative
Yes	1999-2003	negative
Yes	1999-2003	negative
Yes	1999-2003	negative
Yes	1999-2003	negative
Yes	1999-2003	negative
Yes	1999-2003	negative
Yes	1999-2003	negative
Yes	1999-2003	negative
Yes	1999-2003	negative
Yes	1999-2003	negative
Yes	1999-2003	negative
Yes	1999-2003	negative
Yes	1999-2003	negative
Yes	1999-2003	negative
Yes	1999-2003	negative
Yes	1999-2003	negative
Yes	1999-2003	negative
Yes	1999-2003	negative
Yes	1999-2003	negative
Yes	1999-2003	negative
Yes	1999-2003	negative
Yes	1999-2003	negative
Yes	1999-2003	negative
Yes	1999-2003	negative
Yes	1999-2003	negative
Yes	1999-2003	negative
Yes	1999-2003	negative
Yes	1999-2003	negative
Yes	1999-2003	negative
Yes	1999-2003	negative
Yes	1999-2003	negative
Yes	1999-2003	negative
Yes	1999-2003	negative
Yes	1999-2003	negative
Yes	1999-2003	negative
Yes	1999-2003	negative
Yes	1999-2003	negative
Yes	1999-2003	negative
Yes	1999-2003	negative
Yes	1999-2003	negative
No	1999-2003	negative
No	1999-2003	negative
No	1999-2003	negative
No	1999-2003	negative
No	1999-2003	negative
No	1999-2003	negative
No	1999-2003	negative
No	1999-2003	negative
No	1999-2003	negative
No	1999-2003	negative
No	1999-2003	negative
No	1999-2003	negative
No	1999-2003	negative
No	1999-2003	negative
No	1999-2003	negative
No	1999-2003	negative
No	1999-2003	negative
No	1999-2003	negative
No	1999-2003	negative
No	1999-2003	negative
No	1999-2003	negative
No	1999-2003	negative
No	1999-2003	negative
No	1999-2003	negative
No	1999-2003	negative
No	1999-2003	negative
No	1999-2003	negative
No	1999-2003	negative
No	1999-2003	negative
No	1999-2003	negative
No	1999-2003	negative
No	1999-2003	negative
No	1999-2003	negative
No	1999-2003	negative
No	1999-2003	negative
No	1999-2003	negative
No	1999-2003	negative
No	1999-2003	negative
No	1999-2003	negative
No	1999-2003	negative
No	1999-2003	negative
No	1999-2003	negative
Yes	1999-2003	negative
Yes	1999-2003	negative
Yes	1999-2003	negative
Yes	1999-2003	negative
Yes	1999-2003	negative
Yes	1999-2003	negative
Yes	1999-2003	negative
Yes	1999-2003	negative
Yes	1999-2003	negative
Yes	1999-2003	negative
Yes	1999-2003	negative
Yes	1999-2003	negative
Yes	1999-2003	negative
Yes	1999-2003	negative
Yes	1999-2003	negative
Yes	1999-2003	negative
Yes	1999-2003	negative
Yes	1999-2003	negative
Yes	1999-2003	negative
Yes	1999-2003	negative
Yes	1999-2003	negative
Yes	1999-2003	negative
Yes	1999-2003	negative
Yes	1999-2003	negative
Yes	1999-2003	negative
Yes	1999-2003	negative
Yes	1999-2003	negative
Yes	1999-2003	negative
Yes	1999-2003	negative
Yes	1999-2003	negative
Yes	1999-2003	negative
Yes	1999-2003	negative
Yes	1999-2003	negative
Yes	1999-2003	negative
Yes	1999-2003	negative
Yes	1999-2003	negative
Yes	1999-2003	negative
Yes	1999-2003	negative
Yes	1999-2003	negative
Yes	1999-2003	negative
Yes	1999-2003	negative
Yes	1999-2003	negative
Yes	1999-2003	negative
Yes	1999-2003	negative
Yes	1999-2003	negative
Yes	1999-2003	negative
Yes	1999-2003	negative
Yes	1999-2003	negative
Yes	1999-2003	negative
Yes	1999-2003	negative
Yes	1999-2003	negative
Yes	1999-2003	negative
No	1999-2003	negative
No	1999-2003	negative
No	1999-2003	negative
No	1999-2003	negative
No	1999-2003	negative
No	1999-2003	negative
No	1999-2003	negative
No	1999-2003	negative
No	1999-2003	negative
No	1999-2003	negative
No	1999-2003	negative
No	1999-2003	negative
No	1999-2003	negative
No	1999-2003	negative
No	1999-2003	negative
No	1999-2003	negative
No	1999-2003	negative
No	1999-2003	negative
No	1999-2003	negative
No	1999-2003	negative
No	1999-2003	negative
No	1999-2003	negative
No	1999-2003	negative
No	1999-2003	negative
No	1999-2003	negative
No	1999-2003	negative
No	1999-2003	negative
No	1999-2003	negative
No	1999-2003	negative
No	1999-2003	negative
No	1999-2003	negative
No	1999-2003	negative
No	1999-2003	negative
No	1999-2003	negative
No	1999-2003	negative
No	1999-2003	negative
No	1999-2003	negative
No	1999-2003	negative
No	1999-2003	negative
No	1999-2003	negative
No	1999-2003	negative
No	1999-2003	negative
No	1999-2003	negative
No	1999-2003	negative
No	1999-2003	negative
No	1999-2003	negative
No	1999-2003	negative
No	1999-2003	negative
No	1999-2003	negative
No	1999-2003	negative
No	1999-2003	negative
No	1999-2003	negative
No	1999-2003	negative
No	1999-2003	negative
No	1999-2003	negative
No	1999-2003	negative
No	1999-2003	negative
No	1999-2003	negative
No	1999-2003	negative
No	1999-2003	negative
No	1999-2003	negative
No	1999-2003	negative
No	1999-2003	negative
No	1999-2003	negative
Yes	1999-2003	negative
Yes	1999-2003	negative
Yes	1999-2003	negative
Yes	1999-2003	negative
Yes	1999-2003	negative
Yes	1999-2003	negative
Yes	1999-2003	negative
Yes	1999-2003	negative
Yes	1999-2003	negative
Yes	1999-2003	negative
Yes	1999-2003	negative
Yes	1999-2003	negative
Yes	1999-2003	negative
Yes	1999-2003	negative
Yes	1999-2003	negative
Yes	1999-2003	negative
Yes	1999-2003	negative
Yes	1999-2003	negative
Yes	1999-2003	negative
Yes	1999-2003	negative
Yes	1999-2003	negative
Yes	1999-2003	negative
Yes	1999-2003	negative
Yes	1999-2003	negative
Yes	1999-2003	negative
Yes	1999-2003	negative
Yes	1999-2003	negative
Yes	1999-2003	negative
Yes	1999-2003	negative
Yes	1999-2003	negative
Yes	1999-2003	negative
Yes	1999-2003	negative
Yes	1999-2003	negative
Yes	1999-2003	negative
Yes	1999-2003	negative
Yes	1999-2003	negative
Yes	1999-2003	negative
Yes	1999-2003	negative
Yes	1999-2003	negative
Yes	1999-2003	negative
Yes	1999-2003	negative
Yes	1999-2003	negative
Yes	1999-2003	negative
Yes	1999-2003	negative
Yes	1999-2003	negative
Yes	1999-2003	negative
Yes	1999-2003	negative
Yes	1999-2003	negative
Yes	1999-2003	negative
Yes	1999-2003	negative
Yes	1999-2003	negative
Yes	1999-2003	negative
Yes	1999-2003	negative
Yes	1999-2003	negative
Yes	1999-2003	negative
Yes	1999-2003	negative
Yes	1999-2003	negative
Yes	1999-2003	negative
Yes	1999-2003	negative
Yes	1999-2003	negative
Yes	1999-2003	negative
Yes	1999-2003	negative
Yes	1999-2003	negative
Yes	1999-2003	negative
Yes	1999-2003	negative
Yes	1999-2003	negative
Yes	1999-2003	negative
Yes	1999-2003	negative
Yes	1999-2003	negative
Yes	1999-2003	negative
Yes	1999-2003	negative
No	1999-2003	negative
No	1999-2003	negative
No	1999-2003	negative
No	1999-2003	negative
No	1999-2003	negative
No	1999-2003	negative
No	1999-2003	negative
No	1999-2003	negative
No	1999-2003	negative
No	1999-2003	negative
No	1999-2003	negative
No	1999-2003	negative
No	1999-2003	negative
No	1999-2003	negative
No	1999-2003	negative
No	1999-2003	negative
No	1999-2003	negative
No	1999-2003	negative
No	1999-2003	negative
No	1999-2003	negative
No	1999-2003	negative
No	1999-2003	negative
No	1999-2003	negative
No	1999-2003	negative
No	1999-2003	negative
No	1999-2003	negative
No	1999-2003	negative
No	1999-2003	negative
No	1999-2003	negative
No	1999-2003	negative
No	1999-2003	negative
No	1999-2003	negative
No	1999-2003	negative
No	1999-2003	negative
No	1999-2003	negative
No	1999-2003	negative
No	1999-2003	negative
No	1999-2003	negative
No	1999-2003	negative
No	1999-2003	negative
No	1999-2003	negative
No	1999-2003	negative
No	1999-2003	negative
No	1999-2003	negative
No	1999-2003	negative
No	1999-2003	negative
No	1999-2003	negative
No	1999-2003	negative
No	1999-2003	negative
No	1999-2003	negative
No	1999-2003	negative
No	1999-2003	negative
No	1999-2003	negative
No	1999-2003	negative
No	1999-2003	negative
No	1999-2003	negative
No	1999-2003	negative
No	1999-2003	negative
No	1999-2003	negative
No	1999-2003	negative
No	1999-2003	negative
Yes	1999-2003	negative
Yes	1999-2003	negative
Yes	1999-2003	negative
Yes	1999-2003	negative
Yes	1999-2003	negative
Yes	1999-2003	negative
Yes	1999-2003	negative
Yes	1999-2003	negative
Yes	1999-2003	negative
Yes	1999-2003	negative
Yes	1999-2003	negative
Yes	1999-2003	negative
Yes	1999-2003	negative
Yes	1999-2003	negative
Yes	1999-2003	negative
Yes	1999-2003	negative
Yes	1999-2003	negative
Yes	1999-2003	negative
Yes	1999-2003	negative
Yes	1999-2003	negative
Yes	1999-2003	negative
Yes	1999-2003	negative
Yes	1999-2003	negative
Yes	1999-2003	negative
Yes	1999-2003	negative
Yes	1999-2003	negative
Yes	1999-2003	negative
Yes	1999-2003	negative
Yes	1999-2003	negative
Yes	1999-2003	negative
Yes	1999-2003	negative
Yes	1999-2003	negative
Yes	1999-2003	negative
Yes	1999-2003	negative
Yes	1999-2003	negative
Yes	1999-2003	negative
Yes	1999-2003	negative
Yes	1999-2003	negative
Yes	1999-2003	negative
Yes	1999-2003	negative
Yes	1999-2003	negative
Yes	1999-2003	negative
Yes	1999-2003	negative
Yes	1999-2003	negative
Yes	1999-2003	negative
Yes	1999-2003	negative
Yes	1999-2003	negative
Yes	1999-2003	negative
Yes	1999-2003	negative
Yes	1999-2003	negative
Yes	1999-2003	negative
Yes	1999-2003	negative
Yes	1999-2003	negative
No	2011-2015	negative
No	2011-2015	negative
No	2011-2015	negative
No	2011-2015	negative
No	2011-2015	negative
No	2011-2015	negative
No	2011-2015	negative
No	2011-2015	negative
No	2011-2015	negative
No	2011-2015	negative
No	2011-2015	negative
No	2011-2015	negative
No	2011-2015	negative
No	2011-2015	negative
No	2011-2015	negative
No	2011-2015	negative
No	2011-2015	negative
No	2011-2015	negative
No	2011-2015	negative
No	2011-2015	negative
No	2011-2015	negative
No	2011-2015	negative
No	2011-2015	negative
No	2011-2015	negative
No	2011-2015	negative
No	2011-2015	negative
No	2011-2015	negative
No	2011-2015	negative
No	2011-2015	negative
No	2011-2015	negative
No	2011-2015	negative
No	2011-2015	negative
No	2011-2015	negative
No	2011-2015	negative
No	2011-2015	negative
No	2011-2015	negative
No	2011-2015	negative
No	2011-2015	negative
No	2011-2015	negative
No	2011-2015	negative
No	2011-2015	negative
No	2011-2015	negative
No	2011-2015	negative
No	2011-2015	negative
No	2011-2015	negative
No	2011-2015	negative
No	2011-2015	negative
No	2011-2015	negative
No	2011-2015	negative
No	2011-2015	negative
No	2011-2015	negative
No	2011-2015	negative
No	2011-2015	negative
No	2011-2015	negative
No	2011-2015	negative
No	2011-2015	negative
No	2011-2015	negative
No	2011-2015	negative
No	2011-2015	negative
No	2011-2015	negative
No	2011-2015	negative
No	2011-2015	negative
No	2011-2015	negative
No	2011-2015	negative
No	2011-2015	negative
No	2011-2015	negative
No	2011-2015	negative
No	2011-2015	negative
No	2011-2015	negative
No	2011-2015	negative
No	2011-2015	negative
No	2011-2015	negative
Yes	2011-2015	negative
Yes	2011-2015	negative
Yes	2011-2015	negative
Yes	2011-2015	negative
Yes	2011-2015	negative
Yes	2011-2015	negative
Yes	2011-2015	negative
Yes	2011-2015	negative
Yes	2011-2015	negative
Yes	2011-2015	negative
Yes	2011-2015	negative
Yes	2011-2015	negative
Yes	2011-2015	negative
Yes	2011-2015	negative
Yes	2011-2015	negative
Yes	2011-2015	negative
Yes	2011-2015	negative
Yes	2011-2015	negative
Yes	2011-2015	negative
Yes	2011-2015	negative
Yes	2011-2015	negative
Yes	2011-2015	negative
Yes	2011-2015	negative
Yes	2011-2015	negative
Yes	2011-2015	negative
Yes	2011-2015	negative
Yes	2011-2015	negative
Yes	2011-2015	negative
Yes	2011-2015	negative
Yes	2011-2015	negative
Yes	2011-2015	negative
Yes	2011-2015	negative
Yes	2011-2015	negative
Yes	2011-2015	negative
Yes	2011-2015	negative
Yes	2011-2015	negative
Yes	2011-2015	negative
Yes	2011-2015	negative
Yes	2011-2015	negative
Yes	2011-2015	negative
Yes	2011-2015	negative
Yes	2011-2015	negative
Yes	2011-2015	negative
Yes	2011-2015	negative
Yes	2011-2015	negative
Yes	2011-2015	negative
Yes	2011-2015	negative
Yes	2011-2015	negative
Yes	2011-2015	negative
Yes	2011-2015	negative
Yes	2011-2015	negative
Yes	2011-2015	negative
Yes	2011-2015	negative
Yes	2011-2015	negative
Yes	2011-2015	negative
Yes	2011-2015	negative
No	2011-2015	negative
No	2011-2015	negative
No	2011-2015	negative
No	2011-2015	negative
No	2011-2015	negative
No	2011-2015	negative
No	2011-2015	negative
No	2011-2015	negative
No	2011-2015	negative
No	2011-2015	negative
No	2011-2015	negative
No	2011-2015	negative
No	2011-2015	negative
No	2011-2015	negative
No	2011-2015	negative
No	2011-2015	negative
No	2011-2015	negative
No	2011-2015	negative
No	2011-2015	negative
No	2011-2015	negative
No	2011-2015	negative
No	2011-2015	negative
No	2011-2015	negative
No	2011-2015	negative
No	2011-2015	negative
No	2011-2015	negative
No	2011-2015	negative
No	2011-2015	negative
No	2011-2015	negative
No	2011-2015	negative
No	2011-2015	negative
No	2011-2015	negative
No	2011-2015	negative
No	2011-2015	negative
No	2011-2015	negative
No	2011-2015	negative
No	2011-2015	negative
No	2011-2015	negative
No	2011-2015	negative
No	2011-2015	negative
No	2011-2015	negative
Yes	2011-2015	negative
Yes	2011-2015	negative
Yes	2011-2015	negative
Yes	2011-2015	negative
Yes	2011-2015	negative
Yes	2011-2015	negative
Yes	2011-2015	negative
Yes	2011-2015	negative
Yes	2011-2015	negative
Yes	2011-2015	negative
Yes	2011-2015	negative
Yes	2011-2015	negative
Yes	2011-2015	negative
Yes	2011-2015	negative
Yes	2011-2015	negative
Yes	2011-2015	negative
Yes	2011-2015	negative
Yes	2011-2015	negative
Yes	2011-2015	negative
Yes	2011-2015	negative
Yes	2011-2015	negative
Yes	2011-2015	negative
Yes	2011-2015	negative
Yes	2011-2015	negative
Yes	2011-2015	negative
Yes	2011-2015	negative
Yes	2011-2015	negative
No	2011-2015	negative
No	2011-2015	negative
No	2011-2015	negative
No	2011-2015	negative
No	2011-2015	negative
No	2011-2015	negative
No	2011-2015	negative
No	2011-2015	negative
No	2011-2015	negative
No	2011-2015	negative
No	2011-2015	negative
No	2011-2015	negative
No	2011-2015	negative
No	2011-2015	negative
No	2011-2015	negative
No	2011-2015	negative
No	2011-2015	negative
No	2011-2015	negative
No	2011-2015	negative
No	2011-2015	negative
No	2011-2015	negative
No	2011-2015	negative
No	2011-2015	negative
No	2011-2015	negative
No	2011-2015	negative
No	2011-2015	negative
No	2011-2015	negative
No	2011-2015	negative
No	2011-2015	negative
No	2011-2015	negative
No	2011-2015	negative
No	2011-2015	negative
No	2011-2015	negative
No	2011-2015	negative
No	2011-2015	negative
No	2011-2015	negative
No	2011-2015	negative
No	2011-2015	negative
No	2011-2015	negative
No	2011-2015	negative
No	2011-2015	negative
No	2011-2015	negative
No	2011-2015	negative
No	2011-2015	negative
No	2011-2015	negative
No	2011-2015	negative
No	2011-2015	negative
No	2011-2015	negative
No	2011-2015	negative
No	2011-2015	negative
No	2011-2015	negative
No	2011-2015	negative
No	2011-2015	negative
No	2011-2015	negative
No	2011-2015	negative
No	2011-2015	negative
No	2011-2015	negative
No	2011-2015	negative
No	2011-2015	negative
No	2011-2015	negative
No	2011-2015	negative
No	2011-2015	negative
No	2011-2015	negative
No	2011-2015	negative
No	2011-2015	negative
No	2011-2015	negative
No	2011-2015	negative
Yes	2011-2015	negative
Yes	2011-2015	negative
Yes	2011-2015	negative
Yes	2011-2015	negative
Yes	2011-2015	negative
Yes	2011-2015	negative
Yes	2011-2015	negative
Yes	2011-2015	negative
Yes	2011-2015	negative
Yes	2011-2015	negative
Yes	2011-2015	negative
Yes	2011-2015	negative
Yes	2011-2015	negative
Yes	2011-2015	negative
Yes	2011-2015	negative
Yes	2011-2015	negative
Yes	2011-2015	negative
Yes	2011-2015	negative
Yes	2011-2015	negative
Yes	2011-2015	negative
Yes	2011-2015	negative
Yes	2011-2015	negative
Yes	2011-2015	negative
Yes	2011-2015	negative
Yes	2011-2015	negative
Yes	2011-2015	negative
Yes	2011-2015	negative
Yes	2011-2015	negative
Yes	2011-2015	negative
Yes	2011-2015	negative
Yes	2011-2015	negative
Yes	2011-2015	negative
Yes	2011-2015	negative
Yes	2011-2015	negative
Yes	2011-2015	negative
Yes	2011-2015	negative
Yes	2011-2015	negative
Yes	2011-2015	negative
Yes	2011-2015	negative
Yes	2011-2015	negative
Yes	2011-2015	negative
Yes	2011-2015	negative
Yes	2011-2015	negative
Yes	2011-2015	negative
Yes	2011-2015	negative
Yes	2011-2015	negative
Yes	2011-2015	negative
Yes	2011-2015	negative
Yes	2011-2015	negative
No	2011-2015	negative
No	2011-2015	negative
No	2011-2015	negative
No	2011-2015	negative
No	2011-2015	negative
No	2011-2015	negative
No	2011-2015	negative
No	2011-2015	negative
No	2011-2015	negative
No	2011-2015	negative
No	2011-2015	negative
No	2011-2015	negative
No	2011-2015	negative
No	2011-2015	negative
No	2011-2015	negative
No	2011-2015	negative
No	2011-2015	negative
No	2011-2015	negative
No	2011-2015	negative
No	2011-2015	negative
No	2011-2015	negative
No	2011-2015	negative
No	2011-2015	negative
No	2011-2015	negative
No	2011-2015	negative
No	2011-2015	negative
No	2011-2015	negative
No	2011-2015	negative
No	2011-2015	negative
No	2011-2015	negative
No	2011-2015	negative
No	2011-2015	negative
No	2011-2015	negative
No	2011-2015	negative
No	2011-2015	negative
No	2011-2015	negative
No	2011-2015	negative
No	2011-2015	negative
No	2011-2015	negative
No	2011-2015	negative
No	2011-2015	negative
No	2011-2015	negative
No	2011-2015	negative
No	2011-2015	negative
No	2011-2015	negative
No	2011-2015	negative
No	2011-2015	negative
No	2011-2015	negative
No	2011-2015	negative
No	2011-2015	negative
No	2011-2015	negative
No	2011-2015	negative
Yes	2011-2015	negative
Yes	2011-2015	negative
Yes	2011-2015	negative
Yes	2011-2015	negative
Yes	2011-2015	negative
Yes	2011-2015	negative
Yes	2011-2015	negative
Yes	2011-2015	negative
Yes	2011-2015	negative
Yes	2011-2015	negative
Yes	2011-2015	negative
Yes	2011-2015	negative
Yes	2011-2015	negative
Yes	2011-2015	negative
Yes	2011-2015	negative
Yes	2011-2015	negative
Yes	2011-2015	negative
Yes	2011-2015	negative
Yes	2011-2015	negative
Yes	2011-2015	negative
Yes	2011-2015	negative
Yes	2011-2015	negative
Yes	2011-2015	negative
Yes	2011-2015	negative
No	2011-2015	negative
No	2011-2015	negative
No	2011-2015	negative
No	2011-2015	negative
No	2011-2015	negative
No	2011-2015	negative
No	2011-2015	negative
No	2011-2015	negative
Yes	2011-2015	negative
No	2011-2015	negative
No	2011-2015	negative
Yes	2011-2015	negative
No	2011-2015	negative
No	2011-2015	negative
No	2011-2015	negative
No	2011-2015	negative
No	2011-2015	negative
No	2011-2015	negative
No	2011-2015	negative
Yes	2011-2015	negative
No	2011-2015	negative
No	2011-2015	negative
No	2011-2015	negative
No	2011-2015	negative
No	2011-2015	negative
No	2011-2015	negative
Yes	2011-2015	negative
No	2011-2015	negative
No	1993-1997	positive
No	1993-1997	positive
No	1993-1997	positive
No	1993-1997	positive
No	1993-1997	positive
No	1993-1997	positive
No	1993-1997	positive
No	1993-1997	positive
No	1993-1997	positive
No	1993-1997	positive
No	1993-1997	positive
No	1993-1997	positive
No	1993-1997	positive
Yes	1993-1997	positive
Yes	1993-1997	positive
No	1993-1997	positive
No	1993-1997	positive
No	1993-1997	positive
No	1993-1997	positive
No	1993-1997	positive
No	1993-1997	positive
No	1993-1997	positive
No	1993-1997	positive
No	1993-1997	positive
Yes	1993-1997	positive
Yes	1993-1997	positive
No	1993-1997	positive
No	1993-1997	positive
No	1993-1997	positive
No	1993-1997	positive
No	1993-1997	positive
No	1993-1997	positive
No	1993-1997	positive
No	1993-1997	positive
No	1993-1997	positive
No	1993-1997	positive
No	1993-1997	positive
No	1993-1997	positive
Yes	1993-1997	positive
Yes	1993-1997	positive
Yes	1993-1997	positive
Yes	1993-1997	positive
No	1993-1997	positive
No	1993-1997	positive
No	1993-1997	positive
No	1993-1997	positive
No	1993-1997	positive
No	1993-1997	positive
No	1993-1997	positive
No	1993-1997	positive
No	1993-1997	positive
No	1993-1997	positive
No	1993-1997	positive
No	1993-1997	positive
No	1993-1997	positive
Yes	1993-1997	positive
Yes	1993-1997	positive
Yes	1993-1997	positive
No	1993-1997	positive
No	1993-1997	positive
No	1993-1997	positive
No	1993-1997	positive
No	1993-1997	positive
No	1993-1997	positive
No	1993-1997	positive
Yes	1993-1997	positive
No	1999-2003	positive
No	1999-2003	positive
No	1999-2003	positive
No	1999-2003	positive
No	1999-2003	positive
No	1999-2003	positive
No	1999-2003	positive
No	1999-2003	positive
Yes	1999-2003	positive
Yes	1999-2003	positive
No	1999-2003	positive
No	1999-2003	positive
No	1999-2003	positive
No	1999-2003	positive
No	1999-2003	positive
No	1999-2003	positive
No	1999-2003	positive
No	1999-2003	positive
No	1999-2003	positive
Yes	1999-2003	positive
Yes	1999-2003	positive
Yes	1999-2003	positive
No	1999-2003	positive
No	1999-2003	positive
No	1999-2003	positive
No	1999-2003	positive
No	1999-2003	positive
Yes	1999-2003	positive
Yes	1999-2003	positive
Yes	1999-2003	positive
Yes	1999-2003	positive
No	1999-2003	positive
No	1999-2003	positive
No	1999-2003	positive
No	1999-2003	positive
No	1999-2003	positive
No	1999-2003	positive
No	1999-2003	positive
No	1999-2003	positive
No	1999-2003	positive
No	1999-2003	positive
No	1999-2003	positive
No	1999-2003	positive
Yes	1999-2003	positive
Yes	1999-2003	positive
Yes	1999-2003	positive
Yes	1999-2003	positive
No	1999-2003	positive
No	1999-2003	positive
No	1999-2003	positive
Yes	1999-2003	positive
Yes	1999-2003	positive
Yes	1999-2003	positive
No	2011-2015	positive
No	2011-2015	positive
No	2011-2015	positive
No	2011-2015	positive
No	2011-2015	positive
No	2011-2015	positive
No	2011-2015	positive
No	2011-2015	positive
No	2011-2015	positive
No	2011-2015	positive
Yes	2011-2015	positive
No	2011-2015	positive
No	2011-2015	positive
Yes	2011-2015	positive
Yes	2011-2015	positive
Yes	2011-2015	positive
Yes	2011-2015	positive
Yes	2011-2015	positive
Yes	2011-2015	positive
No	2011-2015	positive
No	2011-2015	positive
No	2011-2015	positive
No	2011-2015	positive
No	2011-2015	positive
No	2011-2015	positive
No	2011-2015	positive
No	2011-2015	positive
No	2011-2015	positive
Yes	2011-2015	positive
Yes	2011-2015	positive
Yes	2011-2015	positive
Yes	2011-2015	positive
No	2011-2015	positive
No	2011-2015	positive
No	2011-2015	positive
No	2011-2015	positive
No	2011-2015	positive
No	2011-2015	positive
No	2011-2015	positive
No	2011-2015	positive
No	2011-2015	positive
No	2011-2015	positive
No	2011-2015	positive
No	2011-2015	positive
No	2011-2015	positive
No	2011-2015	positive
No	2011-2015	positive
No	2011-2015	positive
No	2011-2015	positive
No	2011-2015	positive
No	2011-2015	positive
Yes	2011-2015	positive
Yes	2011-2015	positive
Yes	2011-2015	positive
Yes	2011-2015	positive
Yes	2011-2015	positive
Yes	2011-2015	positive
Yes	2011-2015	positive
Yes	2011-2015	positive
Yes	2011-2015	positive
Yes	2011-2015	positive
Yes	2011-2015	positive
Yes	2011-2015	positive
Yes	2011-2015	positive
Yes	2011-2015	positive
Yes	2011-2015	positive
Yes	2011-2015	positive
Yes	2011-2015	positive
No	2011-2015	positive
No	2011-2015	positive
No	2011-2015	positive
No	2011-2015	positive
No	2011-2015	positive
No	2011-2015	positive
No	2011-2015	positive
No	2011-2015	positive
No	2011-2015	positive
No	2011-2015	positive
No	2011-2015	positive
No	2011-2015	positive
No	2011-2015	positive
No	2011-2015	positive
No	2011-2015	positive
No	2011-2015	positive
No	2011-2015	positive
Yes	2011-2015	positive
Yes	2011-2015	positive
Yes	2011-2015	positive
Yes	2011-2015	positive
No	2011-2015	positive
No	2011-2015	positive
No	2011-2015	positive
No	2011-2015	positive
